# Supplementary material for: Environmental and Biological Controls on Sedimentary Bottom Types in the Puquios of the Salar de Llamara, Northern Chile
Source: MDPI journal article supplement (doi:10.3390/geosciences12060247), 2022-06-14
Supplement: s1 [file s1]

Supplemental Table S3: Means for groups in homogeneous subsets of bottom types by environmental parameter as determined using Tukey's HSD .

**Homogeneous Subsets**

|                   |                                       | EC (µ/cm) |                         |          |           |
|-------------------|---------------------------------------|-----------|-------------------------|----------|-----------|
| Bottom Types      |                                       | N         | Subset for alpha = 0.05 |          |           |
| Tukey             |                                       |           | 1                       | 2        | 3         |
| HSD <sup>ab</sup> | Carpet                                | 41        | 38560.24                |          |           |
|                   | Black domes                           | 12        | 39124.17                |          |           |
|                   | Black semi cohesive mat mat           | 8         | 39660.00                |          |           |
|                   | Floccules                             | 48        | 40704.79                |          |           |
|                   | Network on bulbous mat on bulbous mat | 26        | 45266.54                |          |           |
|                   | Orange/brown bulbous mat              | 38        | 55533.95                |          |           |
|                   | Orange gel mat                        | 75        |                         | 95509.60 |           |
|                   | Orange gel mat with black pinnacles   | 16        |                         | 95519.38 |           |
|                   | Spar                                  | 43        |                         |          | 156318.37 |
| Sig.              |                                       |           | 0.499                   | 1.000    | 1.000     |

Means for groups in homogeneous subsets are displayed.

a. Uses Harmonic Mean Sample Size = 21.561.

b. The group sizes are unequal. The harmonic mean of the group sizes is used. Type I error levels

|                            |                                     | pH |                         |        |        |
|----------------------------|-------------------------------------|----|-------------------------|--------|--------|
| Bottom Types               |                                     | N  | Subset for alpha = 0.05 |        |        |
|                            |                                     |    | 1                       | 2      | 3      |
| Tukey<br>HSD <sup>ab</sup> | Orange gel mat with black pinnacles | 16 | 7.6344                  |        |        |
|                            | Orange gel mat                      | 75 | 7.7699                  | 7.7699 |        |
|                            | Spar                                | 43 | 7.8672                  | 7.8672 | 7.8672 |
|                            | Floccules                           | 48 |                         | 7.9877 | 7.9877 |
|                            | Black semi cohesive mat             | 8  |                         |        | 8.0388 |
|                            | Carpet                              | 41 |                         |        | 8.0434 |
|                            | Orange/brown bulbous mat            | 38 |                         |        | 8.0466 |
|                            | Black domes                         | 12 |                         |        | 8.1067 |
|                            | Network on bulbous mat              | 26 |                         |        | 8.1069 |
|                            | Sig.                                |    | 0.076                   | 0.125  | 0.060  |

Means for groups in homogeneous subsets are displayed.

a. Uses Harmonic Mean Sample Size = 21.561.

b. The group sizes are unequal. The harmonic mean of the group sizes is used. Type I error levels

|              |                                     | ORP (mV) |                    |         |
|--------------|-------------------------------------|----------|--------------------|---------|
| Bottom Types |                                     | N        | Subset for alpha = |         |
| Tukey        | HSD <sup>ab</sup>                   |          | 1                  | 2       |
|              | Orange gel mat                      | 75       | -47.635            |         |
|              | Orange gel mat with black pinnacles | 16       | -33.819            | -33.819 |
|              | Orange/brown bulbous mat            | 38       | -18.089            | -18.089 |
|              | Floccules                           | 48       | 1.667              | 1.667   |
|              | Carpet                              | 41       | 11.993             | 11.993  |
|              | Spar                                | 43       | 14.251             | 14.251  |
|              | Network on bulbous mat              | 26       | 17.442             | 17.442  |
|              | Black domes                         | 12       |                    | 23.158  |
|              | Black semi cohesive mat             | 8        |                    | 31.200  |
|              | Sig.                                |          | 0.087              | 0.088   |

Means for groups in homogeneous subsets are displayed.

a. Uses Harmonic Mean Sample Size = 21.561.

b. The group sizes are unequal. The harmonic mean of the group sizes is used. Type I

|                            |                                     | DO (mg/L) |                         |        |        |        |
|----------------------------|-------------------------------------|-----------|-------------------------|--------|--------|--------|
| Bottom Types               |                                     | N         | Subset for alpha = 0.05 |        |        |        |
|                            |                                     |           | 1                       | 2      | 3      | 4      |
| Tukey<br>HSD <sup>ab</sup> | Spar                                | 43        | 1.6563                  |        |        |        |
|                            | Orange gel mat with black pinnacles | 16        | 1.8506                  | 1.8506 |        |        |
|                            | Orange gel mat                      | 75        | 2.3399                  | 2.3399 | 2.3399 |        |
|                            | Carpet                              | 41        |                         | 2.9137 |        | 2.9137 |
|                            | Floccules                           | 48        |                         |        | 3.1365 | 3.1365 |
|                            | Black domes                         | 12        |                         |        | 3.1683 | 3.1683 |
|                            | Black semi cohesive mat             | 8         |                         |        | 3.4400 | 3.4400 |
|                            | Network on bulbous mat              | 26        |                         |        |        | 3.6950 |
|                            | Orange/brown bulbous mat            | 38        |                         |        |        | 3.7337 |
|                            | Sig.                                |           | 0.674                   | 0.114  | 0.089  | 0.425  |

Means for groups in homogeneous subsets are displayed.

a. Uses Harmonic Mean Sample Size = 21.561.

b. The group sizes are unequal. The harmonic mean of the group sizes is used. Type I error levels are not

|                            |                                     | Depth (cm) |                         |       |       |
|----------------------------|-------------------------------------|------------|-------------------------|-------|-------|
| Bottom Types               |                                     | N          | Subset for alpha = 0.05 |       |       |
|                            |                                     |            | 1                       | 2     | 3     |
| Tukey<br>HSD <sup>ab</sup> | Black semi cohesive mat             | 8          | 16.25                   |       |       |
|                            | Network on bulbous mat              | 26         | 17.12                   |       |       |
|                            | Floccules                           | 48         | 18.54                   |       |       |
|                            | Orange/brown bulbous mat            | 38         | 19.74                   | 19.74 |       |
|                            | Carpet                              | 41         | 20.24                   | 20.24 |       |
|                            | Black domes                         | 12         | 25.42                   | 25.42 |       |
|                            | Orange gel mat                      | 75         |                         | 30.72 | 30.72 |
|                            | Spar                                | 43         |                         | 30.81 | 30.81 |
|                            | Orange gel mat with black pinnacles | 16         |                         |       | 38.44 |
| Sig.                       |                                     | 0.222      | 0.061                   | 0.455 |       |

Means for groups in homogeneous subsets are displayed.

a. Uses Harmonic Mean Sample Size = 21.561.

b. The group sizes are unequal. The harmonic mean of the group sizes is used. Type I error levels

|                   |                                     | Turbidity (FNU) |                         |
|-------------------|-------------------------------------|-----------------|-------------------------|
| Bottom Types      |                                     |                 | Subset for alpha = 0.05 |
|                   |                                     | N               | 1                       |
| Tukey             | Spar                                | 43              | 1.851                   |
| HSD <sup>ab</sup> | Network on bulbous mat              | 26              | 5.742                   |
|                   | Black domes                         | 12              | 5.967                   |
|                   | Orange gel mat with black pinnacles | 16              | 10.325                  |
|                   | Black semi cohesive mat             | 8               | 15.688                  |
|                   | Orange/brown bulbous mat            | 38              | 28.008                  |
|                   | Orange gel mat                      | 75              | 35.463                  |
|                   | Carpet                              | 41              | 44.271                  |
|                   | Floccules                           | 48              | 53.775                  |
|                   | Sig.                                |                 | 0.713                   |

Means for groups in homogeneous subsets are displayed.

a. Uses Harmonic Mean Sample Size = 21.561.

b. The group sizes are unequal. The harmonic mean of the group sizes is
