# Supplementary material for: Environmental and Biological Controls on Sedimentary Bottom Types in the Puquios of the Salar de Llamara, Northern Chile
Source: MDPI journal article supplement (doi:10.3390/geosciences12060247), 2022-06-14
Supplement: s1 [file s1]

Supplemental Table S2: ANOVA Post Hoc tests for environmental parameters and bottom types.

## Post Hoc Tests

| Multiple Comparisons |           |                                     |                                     |                         |            |          |                         |             |          |
|----------------------|-----------|-------------------------------------|-------------------------------------|-------------------------|------------|----------|-------------------------|-------------|----------|
| Dependent Variable   |           | (I) Bottom Types                    | (J) Bottom Types                    | Mean Difference (I-J)   | Std. Error | Sig.     | 95% Confidence Interval |             |          |
|                      |           |                                     |                                     |                         |            |          | Lower Bound             | Upper Bound |          |
| EC (µS/cm)           | Tukey HSD | Black domes                         | Black semi cohesive mat             | -535.833                | 12316.067  | 1.000    | -39020.52               | 37948.85    |          |
|                      |           |                                     | Floccules                           | -1580.625               | 8708.774   | 1.000    | -28793.41               | 25632.16    |          |
|                      |           |                                     | Network on bulbous mat              | -6142.372               | 9416.882   | 0.999    | -35567.82               | 23283.07    |          |
|                      |           |                                     | Carpet                              | 563.923                 | 8856.213   | 1.000    | -27109.57               | 28237.41    |          |
|                      |           |                                     | Orange gel mat                      | -56385.433              | 8389.402   | 0.000    | -82600.26               | -30170.61   |          |
|                      |           |                                     | Orange gel mat with black pinnacles | -56395.208              | 10304.361  | 0.000    | -88593.81               | -24196.61   |          |
|                      |           |                                     | Orange/brown bulbous mat            | -16409.781              | 8935.014   | 0.658    | -44329.50               | 11509.94    |          |
|                      |           |                                     | spar                                | -117194.205             | 8809.457   | 0.000    | -144721.60              | -89666.82   |          |
|                      |           | Black semi cohesive mat             | Black domes                         | 535.833                 | 12316.067  | 1.000    | -37948.85               | 39020.52    |          |
|                      |           |                                     | Floccules                           | -1044.792               | 10304.361  | 1.000    | -33243.39               | 31153.81    |          |
|                      |           |                                     | Network on bulbous mat              | -5606.538               | 10909.389  | 1.000    | -39695.70               | 28482.62    |          |
|                      |           |                                     | Carpet                              | 1099.756                | 10429.267  | 1.000    | -31489.14               | 33688.65    |          |
|                      |           |                                     | Orange gel mat                      | -55849.600              | 10035.894  | 0.000    | -87209.30               | -24489.90   |          |
|                      |           |                                     | Orange gel mat with black pinnacles | -55859.375              | 11684.047  | 0.000    | -92369.15               | -19349.60   |          |
|                      |           |                                     | Orange/brown bulbous mat            | -15873.947              | 10496.265  | 0.849    | -48672.20               | 16924.30    |          |
|                      |           |                                     | Spar                                | -116658.372             | 10389.593  | 0.000    | -149123.30              | -84193.45   |          |
|                      |           | Floccules                           | Black domes                         | 1580.625                | 8708.774   | 1.000    | -25632.16               | 28793.41    |          |
|                      |           |                                     | Black semi cohesive mat             | 1044.792                | 10304.361  | 1.000    | -31153.81               | 33243.39    |          |
|                      |           |                                     | Network on bulbous mat              | -4561.747               | 6570.542   | 0.999    | -25093.08               | 15969.58    |          |
|                      |           |                                     | Carpet                              | 2144.548                | 5738.192   | 1.000    | -15785.89               | 20074.99    |          |
|                      |           |                                     | Orange gel mat                      | -54804.808              | 4987.627   | 0.000    | -70389.92               | -39219.70   |          |
|                      |           |                                     | Orange gel mat with black pinnacles | -54814.583              | 7789.364   | 0.000    | -79154.43               | -30474.73   |          |
|                      |           |                                     | Orange/brown bulbous mat            | -14829.156              | 5859.080   | 0.221    | -33137.34               | 3479.03     |          |
|                      |           |                                     | Spar                                | -115613.580             | 5665.764   | 0.000    | -133317.70              | -97909.46   |          |
|                      |           | Network on bulbous mat              | Black domes                         | 6142.372                | 9416.882   | 0.999    | -23283.07               | 35567.82    |          |
|                      |           |                                     | Black semi cohesive mat             | 5606.538                | 10909.389  | 1.000    | -28482.62               | 39695.70    |          |
|                      |           |                                     | Floccules                           | 4561.747                | 6570.542   | 0.999    | -15969.58               | 25093.08    |          |
|                      |           |                                     | Carpet                              | 6706.295                | 6764.745   | 0.986    | -14431.87               | 27844.46    |          |
|                      |           |                                     | Orange gel mat                      | -50243.062              | 6140.957   | 0.000    | -69432.04               | -31054.08   |          |
|                      |           |                                     | Orange gel mat with black pinnacles | -50252.837              | 8573.746   | 0.000    | -77043.69               | -23461.98   |          |
|                      |           |                                     | Orange/brown bulbous mat            | -10267.409              | 6867.587   | 0.857    | -31726.93               | 11192.11    |          |
|                      |           |                                     | Spar                                | -111051.834             | 6703.418   | 0.000    | -131998.37              | -90105.30   |          |
|                      |           | Carpet                              | Black domes                         | -563.923                | 8856.213   | 1.000    | -28237.41               | 27109.57    |          |
|                      |           |                                     | Black semi cohesive mat             | -1099.756               | 10429.267  | 1.000    | -33688.65               | 31489.14    |          |
|                      |           |                                     | Floccules                           | -2144.548               | 5738.192   | 1.000    | -20074.99               | 15785.89    |          |
|                      |           |                                     | Network on bulbous mat              | -6706.295               | 6764.745   | 0.986    | -27844.46               | 14431.87    |          |
|                      |           |                                     | Orange gel mat                      | -56949.356              | 5240.818   | 0.000    | -73325.63               | -40573.09   |          |
|                      |           |                                     | Orange gel mat with black pinnacles | -56959.131              | 7953.864   | 0.000    | -81813.00               | -32105.26   |          |
|                      |           |                                     | Orange/brown bulbous mat            | -16973.703              | 6076.066   | 0.122    | -35959.92               | 2012.51     |          |
|                      |           |                                     | Spar                                | -117758.128             | 5889.876   | 0.000    | -136162.54              | -99353.71   |          |
|                      |           | Orange gel mat                      | Black domes                         | 56385.433               | 8389.402   | 0.000    | 30170.61                | 82600.26    |          |
|                      |           |                                     | Black semi cohesive mat             | 55849.600               | 10035.894  | 0.000    | 24489.90                | 87209.30    |          |
|                      |           |                                     | Floccules                           | 54804.808               | 4987.627   | 0.000    | 39219.70                | 70389.92    |          |
|                      |           |                                     | Network on bulbous mat              | 50243.062               | 6140.957   | 0.000    | 31054.08                | 69432.04    |          |
|                      |           |                                     | Carpet                              | 56949.356               | 5240.818   | 0.000    | 40573.09                | 73325.63    |          |
|                      |           |                                     | Orange gel mat with black pinnacles | -9.775                  | 7430.580   | 1.000    | -23228.51               | 23208.96    |          |
|                      |           |                                     | Orange/brown bulbous mat            | 39975.653               | 5372.908   | 0.000    | 23186.63                | 56764.67    |          |
|                      |           |                                     | Spar                                | -60808.772              | 5161.415   | 0.000    | -76936.93               | -44680.62   |          |
|                      |           | Orange gel mat with black pinnacles | Black domes                         | 56395.208               | 10304.361  | 0.000    | 24196.61                | 88593.81    |          |
|                      |           |                                     | Black semi cohesive mat             | 55859.375               | 11684.047  | 0.000    | 19349.60                | 92369.15    |          |
|                      |           |                                     | Floccules                           | 54814.583               | 7789.364   | 0.000    | 30474.73                | 79154.43    |          |
|                      |           |                                     | Network on bulbous mat              | 50252.837               | 8573.746   | 0.000    | 23461.98                | 77043.69    |          |
|                      |           |                                     | Carpet                              | 56959.131               | 7953.864   | 0.000    | 32105.26                | 81813.00    |          |
|                      |           |                                     | Orange gel mat                      | 9.775                   | 7430.580   | 1.000    | -23208.96               | 23228.51    |          |
|                      |           |                                     | Orange/brown bulbous mat            | 39985.428               | 8041.512   | 0.000    | 14857.68                | 65113.18    |          |
|                      |           |                                     | Spar                                | -60798.997              | 7901.771   | 0.000    | -85490.09               | -36107.90   |          |
|                      |           | Orange/brown bulbous mat            | Black domes                         | 16409.781               | 8935.014   | 0.658    | -11509.94               | 44329.50    |          |
|                      |           |                                     | Black semi cohesive mat             | 15873.947               | 10496.265  | 0.849    | -16924.30               | 48672.20    |          |
|                      |           |                                     | Floccules                           | 14829.156               | 5859.080   | 0.221    | -3479.03                | 33137.34    |          |
|                      |           |                                     | Network on bulbous mat              | 10267.409               | 6867.587   | 0.857    | -11192.11               | 31726.93    |          |
|                      |           |                                     | Carpet                              | 16973.703               | 6076.066   | 0.122    | -2012.51                | 35959.92    |          |
|                      |           |                                     | Orange gel mat                      | -39975.653              | 5372.908   | 0.000    | -56764.67               | -23186.63   |          |
|                      |           |                                     | Orange gel mat with black pinnacles | -39985.428              | 8041.512   | 0.000    | -65113.18               | -14857.68   |          |
|                      |           |                                     | Spar                                | -100784.425             | 6007.712   | 0.000    | -119557.05              | -82011.80   |          |
|                      |           | Spar                                | Black domes                         | 117194.205              | 8809.457   | 0.000    | 89666.82                | 144721.60   |          |
|                      |           |                                     | Black semi cohesive mat             | 116658.372              | 10389.593  | 0.000    | 84193.45                | 149123.30   |          |
|                      |           |                                     | Floccules                           | 115613.580              | 5665.764   | 0.000    | 97909.46                | 133317.70   |          |
|                      |           |                                     | Network on bulbous mat              | 111051.834              | 6703.418   | 0.000    | 90105.30                | 131998.37   |          |
|                      |           |                                     | Carpet                              | 117758.128              | 5889.876   | 0.000    | 99353.71                | 136162.54   |          |
|                      |           |                                     | Orange gel mat                      | 60808.772               | 5161.415   | 0.000    | 44680.62                | 76936.93    |          |
|                      |           |                                     | Orange gel mat with black pinnacles | 60798.997               | 7901.771   | 0.000    | 36107.90                | 85490.09    |          |
|                      |           |                                     | Orange/brown bulbous mat            | 100784.425              | 6007.712   | 0.000    | 82011.80                | 119557.05   |          |
|                      |           | Games-Howell                        | Black domes                         | Black semi cohesive mat | -535.833   | 2043.036 | 1.000                   | -8196.08    | 7124.41  |
|                      |           |                                     |                                     | Floccules               | -1580.625  | 3656.551 | 1.000                   | -13397.77   | 10236.52 |
|                      |           |                                     |                                     | Network on bulbous mat  | -6142.372  | 3596.521 | 0.737                   | -18175.35   | 5890.61  |
|                      |           |                                     |                                     | Carpet                  | 563.923    | 1630.308 | 1.000                   | -4755.76    | 5883.61  |

|    |           |                                     |                                     |             |          |       |            |            |
|----|-----------|-------------------------------------|-------------------------------------|-------------|----------|-------|------------|------------|
|    |           |                                     | Orange gel mat                      | -56385.433  | 4953.198 | 0.000 | -72179.83  | -40591.04  |
|    |           |                                     | Orange gel mat with black pinnacles | -56395.208  | 8316.065 | 0.000 | -86122.80  | -26667.62  |
|    |           |                                     | Orange/brown bulbous mat            | -16409.781  | 3145.172 | 0.000 | -26664.23  | -6155.34   |
|    |           |                                     | Spar                                | -117194.205 | 3411.733 | 0.000 | -128264.55 | -106123.86 |
|    |           | Black semi cohesive mat             | Black domes                         | 535.833     | 2043.036 | 1.000 | -7124.41   | 8196.08    |
|    |           |                                     | Floccules                           | -1044.792   | 3934.844 | 1.000 | -13781.99  | 11692.41   |
|    |           |                                     | Network on bulbous mat              | -5606.538   | 3879.123 | 0.871 | -18494.62  | 7281.54    |
|    |           |                                     | Carpet                              | 1099.756    | 2184.155 | 1.000 | -6711.66   | 8911.18    |
|    |           |                                     | Orange gel mat                      | -55849.600  | 5162.054 | 0.000 | -72307.76  | -39391.44  |
|    |           |                                     | Orange gel mat with black pinnacles | -55859.375  | 8442.131 | 0.000 | -85806.28  | -25912.47  |
|    |           |                                     | Orange/brown bulbous mat            | -15873.947  | 3464.784 | 0.001 | -27216.31  | -4531.59   |
|    |           |                                     | Spar                                | -116658.372 | 3708.443 | 0.000 | -128721.64 | -104595.11 |
|    |           | Floccules                           | Black domes                         | 1580.625    | 3656.551 | 1.000 | -10236.52  | 13397.77   |
|    |           |                                     | Black semi cohesive mat             | 1044.792    | 3934.844 | 1.000 | -11692.41  | 13781.99   |
|    |           |                                     | Network on bulbous mat              | -4561.747   | 4923.816 | 0.991 | -20352.24  | 11228.75   |
|    |           |                                     | Carpet                              | 2144.548    | 3737.232 | 1.000 | -9887.89   | 14176.99   |
|    |           |                                     | Orange gel mat                      | -54804.808  | 5986.917 | 0.000 | -73718.60  | -35891.02  |
|    |           |                                     | Orange gel mat with black pinnacles | -54814.583  | 8970.281 | 0.000 | -85749.53  | -23879.64  |
|    |           |                                     | Orange/brown bulbous mat            | -14829.156  | 4604.466 | 0.045 | -29491.10  | -167.21    |
|    |           |                                     | Spar                                | -115613.580 | 4790.503 | 0.000 | -130844.82 | -100382.34 |
|    |           | Network on bulbous mat              | Black domes                         | 6142.372    | 3596.521 | 0.737 | -5890.61   | 18175.35   |
|    |           |                                     | Black semi cohesive mat             | 5606.538    | 3879.123 | 0.871 | -7281.54   | 18494.62   |
|    |           |                                     | Floccules                           | 4561.747    | 4923.816 | 0.991 | -11228.75  | 20352.24   |
|    |           |                                     | Carpet                              | 6706.295    | 3678.519 | 0.667 | -5516.69   | 18929.28   |
|    |           |                                     | Orange gel mat                      | -50243.062  | 5950.443 | 0.000 | -69130.50  | -31355.62  |
|    |           |                                     | Orange gel mat with black pinnacles | -50252.837  | 8945.979 | 0.000 | -81165.19  | -19340.48  |
|    |           |                                     | Orange/brown bulbous mat            | -10267.409  | 4556.940 | 0.388 | -24975.14  | 4440.32    |
|    |           |                                     | Spar                                | -111051.834 | 4744.841 | 0.000 | -126312.40 | -95791.27  |
|    |           | Carpet                              | Black domes                         | -563.923    | 1630.308 | 1.000 | -5883.61   | 4755.76    |
|    |           |                                     | Black semi cohesive mat             | -1099.756   | 2184.155 | 1.000 | -8911.18   | 6711.66    |
|    |           |                                     | Floccules                           | -2144.548   | 3737.232 | 1.000 | -14176.99  | 9887.89    |
|    |           |                                     | Network on bulbous mat              | -6706.295   | 3678.519 | 0.667 | -18929.28  | 5516.69    |
|    |           |                                     | Orange gel mat                      | -56949.356  | 5013.054 | 0.000 | -72912.22  | -40986.49  |
|    |           |                                     | Orange gel mat with black pinnacles | -56959.131  | 8351.855 | 0.000 | -86742.43  | -27175.83  |
|    |           |                                     | Orange/brown bulbous mat            | -16973.703  | 3238.617 | 0.000 | -27468.51  | -6478.90   |
|    |           |                                     | Spar                                | -117758.128 | 3498.065 | 0.000 | -129055.07 | -106461.19 |
|    |           | Orange gel mat                      | Black domes                         | 56385.433   | 4953.198 | 0.000 | 40591.04   | 72179.83   |
|    |           |                                     | Black semi cohesive mat             | 55849.600   | 5162.054 | 0.000 | 39391.44   | 72307.76   |
|    |           |                                     | Floccules                           | 54804.808   | 5986.917 | 0.000 | 35891.02   | 73718.60   |
|    |           |                                     | Network on bulbous mat              | 50243.062   | 5950.443 | 0.000 | 31355.62   | 69130.50   |
|    |           |                                     | Carpet                              | 56949.356   | 5013.054 | 0.000 | 40986.49   | 72912.22   |
|    |           |                                     | Orange gel mat with black pinnacles | -9.775      | 9572.343 | 1.000 | -32267.55  | 32248.00   |
|    |           |                                     | Orange/brown bulbous mat            | 39975.653   | 5689.017 | 0.000 | 21970.51   | 57980.80   |
|    |           |                                     | Spar                                | -60808.772  | 5840.610 | 0.000 | -79276.02  | -42341.52  |
|    |           | Orange gel mat with black pinnacles | Black domes                         | 56395.208   | 8316.065 | 0.000 | 26667.62   | 86122.80   |
|    |           |                                     | Black semi cohesive mat             | 55859.375   | 8442.131 | 0.000 | 25912.47   | 85806.28   |
|    |           |                                     | Floccules                           | 54814.583   | 8970.281 | 0.000 | 23879.64   | 85749.53   |
|    |           |                                     | Network on bulbous mat              | 50252.837   | 8945.979 | 0.000 | 19340.48   | 81165.19   |
|    |           |                                     | Carpet                              | 56959.131   | 8351.855 | 0.000 | 27175.83   | 86742.43   |
|    |           |                                     | Orange gel mat                      | 9.775       | 9572.343 | 1.000 | -32248.00  | 32267.55   |
|    |           |                                     | Orange/brown bulbous mat            | 39985.428   | 8774.262 | 0.005 | 9442.29    | 70528.56   |
|    |           |                                     | Spar                                | -60798.997  | 8873.302 | 0.000 | -91537.42  | -30060.57  |
|    |           | Orange/brown bulbous mat            | Black domes                         | 16409.781   | 3145.172 | 0.000 | 6155.34    | 26664.23   |
|    |           |                                     | Black semi cohesive mat             | 15873.947   | 3464.784 | 0.001 | 4531.59    | 27216.31   |
|    |           |                                     | Floccules                           | 14829.156   | 4604.466 | 0.045 | 167.21     | 29491.10   |
|    |           |                                     | Network on bulbous mat              | 10267.409   | 4556.940 | 0.388 | -4440.32   | 24975.14   |
|    |           |                                     | Carpet                              | 16973.703   | 3238.617 | 0.000 | 6478.90    | 27468.51   |
|    |           |                                     | Orange gel mat                      | -39975.653  | 5689.017 | 0.000 | -57980.80  | -21970.51  |
|    |           |                                     | Orange gel mat with black pinnacles | -39985.428  | 8774.262 | 0.005 | -70528.56  | -9442.29   |
|    |           |                                     | Spar                                | -100784.425 | 4412.557 | 0.000 | -114858.10 | -86710.75  |
|    |           | Spar                                | Black domes                         | 117194.205  | 3411.733 | 0.000 | 106123.86  | 128264.55  |
|    |           |                                     | Black semi cohesive mat             | 116658.372  | 3708.443 | 0.000 | 104595.11  | 128721.64  |
|    |           |                                     | Floccules                           | 115613.580  | 4790.503 | 0.000 | 100382.34  | 130844.82  |
|    |           |                                     | Network on bulbous mat              | 111051.834  | 4744.841 | 0.000 | 95791.27   | 126312.40  |
|    |           |                                     | Carpet                              | 117758.128  | 3498.065 | 0.000 | 106461.19  | 129055.07  |
|    |           |                                     | Orange gel mat                      | 60808.772   | 5840.610 | 0.000 | 42341.52   | 79276.02   |
|    |           |                                     | Orange gel mat with black pinnacles | 60798.997   | 8873.302 | 0.000 | 30060.57   | 91537.42   |
|    |           |                                     | Orange/brown bulbous mat            | 100784.425  | 4412.557 | 0.000 | 86710.75   | 114858.10  |
| pH | Tukey HSD | Black domes                         | Black semi cohesive mat             | 0.06792     | 0.11726  | 1.000 | -0.2985    | 0.4343     |
|    |           |                                     | Floccules                           | 0.11896     | 0.08292  | 0.884 | -0.1401    | 0.3781     |
|    |           |                                     | Network on bulbous mat              | -0.00026    | 0.08966  | 1.000 | -0.2804    | 0.2799     |
|    |           |                                     | Carpet                              | 0.06325     | 0.08432  | 0.998 | -0.2002    | 0.3267     |
|    |           |                                     | Orange gel mat                      | .33680      | 0.07988  | 0.001 | 0.0872     | 0.5864     |
|    |           |                                     | Orange gel mat with black pinnacles | .47229      | 0.09811  | 0.000 | 0.1657     | 0.7789     |
|    |           |                                     | Orange/brown bulbous mat            | 0.06009     | 0.08507  | 0.999 | -0.2057    | 0.3259     |
|    |           |                                     | spar                                | 0.23946     | 0.08388  | 0.104 | -0.0226    | 0.5016     |
|    |           | Black semi cohesive mat             | Black domes                         | -0.06792    | 0.11726  | 1.000 | -0.4343    | 0.2985     |
|    |           |                                     | Floccules                           | 0.05104     | 0.09811  | 1.000 | -0.2555    | 0.3576     |
|    |           |                                     | Network on bulbous mat              | -0.06817    | 0.10387  | 0.999 | -0.3927    | 0.2564     |
|    |           |                                     | Carpet                              | -0.00466    | 0.09930  | 1.000 | -0.3149    | 0.3056     |

|              |                                     |                                     |          |         |       |         |         |
|--------------|-------------------------------------|-------------------------------------|----------|---------|-------|---------|---------|
|              | Orange gel mat                      | Orange gel mat                      | 0.26888  | 0.09555 | 0.116 | -0.0297 | 0.5675  |
|              |                                     | Orange gel mat with black pinnacles | .40438*  | 0.11125 | 0.010 | 0.0568  | 0.7520  |
|              |                                     | Orange/brown bulbous mat            | -0.00783 | 0.09994 | 1.000 | -0.3201 | 0.3044  |
|              |                                     | Spar                                | 0.17154  | 0.09892 | 0.725 | -0.1376 | 0.4806  |
|              | Floccules                           | Black domes                         | -0.11896 | 0.08292 | 0.884 | -0.3781 | 0.1401  |
|              |                                     | Black semi cohesive mat             | -0.05104 | 0.09811 | 1.000 | -0.3576 | 0.2555  |
|              |                                     | Network on bulbous mat              | -0.11921 | 0.06256 | 0.610 | -0.3147 | 0.0763  |
|              |                                     | Carpet                              | -0.05571 | 0.05463 | 0.984 | -0.2264 | 0.1150  |
|              |                                     | Orange gel mat                      | .21784*  | 0.04749 | 0.000 | 0.0695  | 0.3662  |
|              |                                     | Orange gel mat with black pinnacles | .35333*  | 0.07416 | 0.000 | 0.1216  | 0.5851  |
|              |                                     | Orange/brown bulbous mat            | -0.05887 | 0.05579 | 0.980 | -0.2332 | 0.1154  |
|              |                                     | Spar                                | 0.12050  | 0.05394 | 0.387 | -0.0481 | 0.2891  |
|              | Network on bulbous mat              | Black domes                         | 0.00026  | 0.08966 | 1.000 | -0.2799 | 0.2804  |
|              |                                     | Black semi cohesive mat             | 0.06817  | 0.10387 | 0.999 | -0.2564 | 0.3927  |
|              |                                     | Floccules                           | 0.11921  | 0.06256 | 0.610 | -0.0763 | 0.3147  |
|              |                                     | Carpet                              | 0.06351  | 0.06441 | 0.987 | -0.1378 | 0.2648  |
|              |                                     | Orange gel mat                      | .33706*  | 0.05847 | 0.000 | 0.1544  | 0.5198  |
|              |                                     | Orange gel mat with black pinnacles | .47255*  | 0.08163 | 0.000 | 0.2175  | 0.7276  |
|              |                                     | Orange/brown bulbous mat            | 0.06034  | 0.06539 | 0.992 | -0.1440 | 0.2647  |
|              |                                     | Spar                                | .23971*  | 0.06382 | 0.006 | 0.0403  | 0.4391  |
|              | Carpet                              | Black domes                         | -0.06325 | 0.08432 | 0.998 | -0.3267 | 0.2002  |
|              |                                     | Black semi cohesive mat             | 0.00466  | 0.09930 | 1.000 | -0.3056 | 0.3149  |
|              |                                     | Floccules                           | 0.05571  | 0.05463 | 0.984 | -0.1150 | 0.2264  |
|              |                                     | Network on bulbous mat              | -0.06351 | 0.06441 | 0.987 | -0.2648 | 0.1378  |
|              |                                     | Orange gel mat                      | .27355*  | 0.04990 | 0.000 | 0.1176  | 0.4295  |
|              |                                     | Orange gel mat with black pinnacles | .40904*  | 0.07573 | 0.000 | 0.1724  | 0.6457  |
|              |                                     | Orange/brown bulbous mat            | -0.00316 | 0.05785 | 1.000 | -0.1839 | 0.1776  |
|              |                                     | Spar                                | .17621*  | 0.05608 | 0.048 | 0.0010  | 0.3514  |
|              | Orange gel mat                      | Black domes                         | -.33680* | 0.07988 | 0.001 | -0.5864 | -0.0872 |
|              |                                     | Black semi cohesive mat             | -0.26888 | 0.09555 | 0.116 | -0.5675 | 0.0297  |
|              |                                     | Floccules                           | -.21784* | 0.04749 | 0.000 | -0.3662 | -0.0695 |
|              |                                     | Network on bulbous mat              | -.33706* | 0.05847 | 0.000 | -0.5198 | -0.1544 |
|              |                                     | Carpet                              | -.27355* | 0.04990 | 0.000 | -0.4295 | -0.1176 |
|              |                                     | Orange gel mat with black pinnacles | 0.13549  | 0.07075 | 0.604 | -0.0856 | 0.3566  |
|              |                                     | Orange/brown bulbous mat            | -.27671* | 0.05116 | 0.000 | -0.4366 | -0.1169 |
|              |                                     | Spar                                | -0.09734 | 0.04914 | 0.558 | -0.2509 | 0.0562  |
|              | Orange gel mat with black pinnacles | Black domes                         | -.47229* | 0.09811 | 0.000 | -0.7789 | -0.1657 |
|              |                                     | Black semi cohesive mat             | -.40438* | 0.11125 | 0.010 | -0.7520 | -0.0568 |
|              |                                     | Floccules                           | -.35333* | 0.07416 | 0.000 | -0.5851 | -0.1216 |
|              |                                     | Network on bulbous mat              | -.47255* | 0.08163 | 0.000 | -0.7276 | -0.2175 |
|              |                                     | Carpet                              | -.40904* | 0.07573 | 0.000 | -0.6457 | -0.1724 |
|              |                                     | Orange gel mat                      | -0.13549 | 0.07075 | 0.604 | -0.3566 | 0.0856  |
|              |                                     | Orange/brown bulbous mat            | -.41220* | 0.07656 | 0.000 | -0.6515 | -0.1730 |
|              |                                     | Spar                                | -0.23283 | 0.07523 | 0.055 | -0.4679 | 0.0023  |
|              | Orange/brown bulbous mat            | Black domes                         | -0.06009 | 0.08507 | 0.999 | -0.3259 | 0.2057  |
|              |                                     | Black semi cohesive mat             | 0.00783  | 0.09994 | 1.000 | -0.3044 | 0.3201  |
|              |                                     | Floccules                           | 0.05887  | 0.05579 | 0.980 | -0.1154 | 0.2332  |
|              |                                     | Network on bulbous mat              | -0.06034 | 0.06539 | 0.992 | -0.2647 | 0.1440  |
|              |                                     | Carpet                              | 0.00316  | 0.05785 | 1.000 | -0.1776 | 0.1839  |
|              |                                     | Orange gel mat                      | .27671*  | 0.05116 | 0.000 | 0.1169  | 0.4366  |
|              |                                     | Orange gel mat with black pinnacles | .41220*  | 0.07656 | 0.000 | 0.1730  | 0.6515  |
|              |                                     | Spar                                | .17937*  | 0.05720 | 0.048 | 0.0006  | 0.3581  |
|              | Spar                                | Black domes                         | -0.23946 | 0.08388 | 0.104 | -0.5016 | 0.0226  |
|              |                                     | Black semi cohesive mat             | -0.17154 | 0.09892 | 0.725 | -0.4806 | 0.1376  |
|              |                                     | Floccules                           | -0.12050 | 0.05394 | 0.387 | -0.2891 | 0.0481  |
|              |                                     | Network on bulbous mat              | -.23971* | 0.06382 | 0.006 | -0.4391 | -0.0403 |
|              |                                     | Carpet                              | -.17621* | 0.05608 | 0.048 | -0.3514 | -0.0010 |
|              |                                     | Orange gel mat                      | 0.09734  | 0.04914 | 0.558 | -0.0562 | 0.2509  |
|              |                                     | Orange gel mat with black pinnacles | 0.23283  | 0.07523 | 0.055 | -0.0023 | 0.4679  |
|              |                                     | Orange/brown bulbous mat            | -.17937* | 0.05720 | 0.048 | -0.3581 | -0.0006 |
| Games-Howell | Black domes                         | Black semi cohesive mat             | 0.06792  | 0.03883 | 0.711 | -0.0707 | 0.2065  |
|              |                                     | Floccules                           | 0.11896  | 0.05090 | 0.346 | -0.0482 | 0.2861  |
|              |                                     | Network on bulbous mat              | -0.00026 | 0.05396 | 1.000 | -0.1788 | 0.1783  |
|              |                                     | Carpet                              | 0.06325  | 0.05157 | 0.945 | -0.1062 | 0.2327  |
|              |                                     | Orange gel mat                      | .33680*  | 0.05331 | 0.000 | 0.1637  | 0.5099  |
|              |                                     | Orange gel mat with black pinnacles | .47229*  | 0.06884 | 0.000 | 0.2377  | 0.7069  |
|              |                                     | Orange/brown bulbous mat            | 0.06009  | 0.04701 | 0.930 | -0.0966 | 0.2168  |
|              |                                     | Spar                                | .23946*  | 0.04565 | 0.000 | 0.0866  | 0.3923  |
|              | Black semi cohesive mat             | Black domes                         | -0.06792 | 0.03883 | 0.711 | -0.2065 | 0.0707  |
|              |                                     | Floccules                           | 0.05104  | 0.04098 | 0.942 | -0.0815 | 0.1835  |
|              |                                     | Network on bulbous mat              | -0.06817 | 0.04473 | 0.836 | -0.2171 | 0.0807  |
|              |                                     | Carpet                              | -0.00466 | 0.04181 | 1.000 | -0.1406 | 0.1313  |
|              |                                     | Orange gel mat                      | .26888*  | 0.04394 | 0.000 | 0.1286  | 0.4091  |
|              |                                     | Orange gel mat with black pinnacles | .40438*  | 0.06186 | 0.000 | 0.1867  | 0.6221  |
|              |                                     | Orange/brown bulbous mat            | -0.00783 | 0.03603 | 1.000 | -0.1255 | 0.1099  |
|              |                                     | Spar                                | .17154*  | 0.03423 | 0.000 | 0.0600  | 0.2831  |
|              | Floccules                           | Black domes                         | -0.11896 | 0.05090 | 0.346 | -0.2861 | 0.0482  |
|              |                                     | Black semi cohesive mat             | -0.05104 | 0.04098 | 0.942 | -0.1835 | 0.0815  |
|              |                                     | Network on bulbous mat              | -0.11921 | 0.05553 | 0.453 | -0.2978 | 0.0594  |
|              |                                     | Carpet                              | -0.05571 | 0.05321 | 0.980 | -0.2250 | 0.1136  |
|              |                                     | Orange gel mat                      | .21784*  | 0.05490 | 0.004 | 0.0444  | 0.3913  |

|          |           |                                     |                                     |          |         |       |          |         |
|----------|-----------|-------------------------------------|-------------------------------------|----------|---------|-------|----------|---------|
| ORP (mV) | Tukey HSD |                                     | Orange gel mat with black pinnacles | .35333   | 0.07007 | 0.001 | 0.1180   | 0.5886  |
|          |           |                                     | Orange/brown bulbous mat            | -0.05887 | 0.04880 | 0.953 | -0.2143  | 0.0965  |
|          |           |                                     | Spar                                | 0.12050  | 0.04749 | 0.229 | -0.0306  | 0.2716  |
|          |           | Network on bulbous mat              | Black domes                         | 0.00026  | 0.05396 | 1.000 | -0.1783  | 0.1788  |
|          |           |                                     | Black semi cohesive mat             | 0.06817  | 0.04473 | 0.836 | -0.0807  | 0.2171  |
|          |           |                                     | Floccules                           | 0.11921  | 0.05553 | 0.453 | -0.0594  | 0.2978  |
|          |           |                                     | Carpet                              | 0.06351  | 0.05615 | 0.967 | -0.1173  | 0.2443  |
|          |           |                                     | Orange gel mat                      | .33706   | 0.05775 | 0.000 | 0.1525   | 0.5216  |
|          |           |                                     | Orange gel mat with black pinnacles | .47255   | 0.07233 | 0.000 | 0.2305   | 0.7146  |
|          |           |                                     | Orange/brown bulbous mat            | 0.06034  | 0.05199 | 0.961 | -0.1080  | 0.2287  |
|          |           |                                     | Spar                                | .23971   | 0.05076 | 0.001 | 0.0751   | 0.4043  |
|          |           | Carpet                              | Black domes                         | -0.06325 | 0.05157 | 0.945 | -0.2327  | 0.1062  |
|          |           |                                     | Black semi cohesive mat             | 0.00466  | 0.04181 | 1.000 | -0.1313  | 0.1406  |
|          |           |                                     | Floccules                           | 0.05571  | 0.05321 | 0.980 | -0.1136  | 0.2250  |
|          |           |                                     | Network on bulbous mat              | -0.06351 | 0.05615 | 0.967 | -0.2443  | 0.1173  |
|          |           |                                     | Orange gel mat                      | .27355   | 0.05552 | 0.000 | 0.0978   | 0.4493  |
|          |           |                                     | Orange gel mat with black pinnacles | .40904   | 0.07056 | 0.000 | 0.1724   | 0.6457  |
|          |           |                                     | Orange/brown bulbous mat            | -0.00316 | 0.04950 | 1.000 | -0.1613  | 0.1549  |
|          |           |                                     | Spar                                | .17621   | 0.04821 | 0.013 | 0.0223   | 0.3301  |
|          |           | Orange gel mat                      | Black domes                         | -.33680  | 0.05331 | 0.000 | -0.5099  | -0.1637 |
|          |           |                                     | Black semi cohesive mat             | -.26888  | 0.04394 | 0.000 | -0.4091  | -0.1286 |
|          |           |                                     | Floccules                           | -.21784  | 0.05490 | 0.004 | -0.3913  | -0.0444 |
|          |           |                                     | Network on bulbous mat              | -.33706  | 0.05775 | 0.000 | -0.5216  | -0.1525 |
|          |           |                                     | Carpet                              | -.27355  | 0.05552 | 0.000 | -0.4493  | -0.0978 |
|          |           |                                     | Orange gel mat with black pinnacles | 0.13549  | 0.07184 | 0.628 | -0.1039  | 0.3748  |
|          |           |                                     | Orange/brown bulbous mat            | -.27671  | 0.05131 | 0.000 | -0.4391  | -0.1143 |
|          |           |                                     | Spar                                | -0.09734 | 0.05006 | 0.585 | -0.2556  | 0.0609  |
|          |           | Orange gel mat with black pinnacles | Black domes                         | -.47229  | 0.06884 | 0.000 | -0.7069  | -0.2377 |
|          |           |                                     | Black semi cohesive mat             | -.40438  | 0.06186 | 0.000 | -0.6221  | -0.1867 |
|          |           |                                     | Floccules                           | -.35333  | 0.07007 | 0.001 | -0.5886  | -0.1180 |
|          |           |                                     | Network on bulbous mat              | -.47255  | 0.07233 | 0.000 | -0.7146  | -0.2305 |
|          |           |                                     | Carpet                              | -.40904  | 0.07056 | 0.000 | -0.6457  | -0.1724 |
|          |           |                                     | Orange gel mat                      | -0.13549 | 0.07184 | 0.628 | -0.3748  | 0.1039  |
|          |           |                                     | Orange/brown bulbous mat            | -.41220  | 0.06730 | 0.000 | -0.6410  | -0.1834 |
|          |           |                                     | Spar                                | -.23283  | 0.06636 | 0.041 | -0.4594  | -0.0063 |
|          |           | Orange/brown bulbous mat            | Black domes                         | -0.06009 | 0.04701 | 0.930 | -0.2168  | 0.0966  |
|          |           |                                     | Black semi cohesive mat             | 0.00783  | 0.03603 | 1.000 | -0.1099  | 0.1255  |
|          |           |                                     | Floccules                           | 0.05887  | 0.04880 | 0.953 | -0.0965  | 0.2143  |
|          |           |                                     | Network on bulbous mat              | -0.06034 | 0.05199 | 0.961 | -0.2287  | 0.1080  |
|          |           |                                     | Carpet                              | 0.00316  | 0.04950 | 1.000 | -0.1549  | 0.1613  |
|          |           |                                     | Orange gel mat                      | .27671   | 0.05131 | 0.000 | 0.1143   | 0.4391  |
|          |           |                                     | Orange gel mat with black pinnacles | .41220   | 0.06730 | 0.000 | 0.1834   | 0.6410  |
|          |           |                                     | Spar                                | .17937   | 0.04329 | 0.003 | 0.0412   | 0.3175  |
|          |           | Spar                                | Black domes                         | -.23946  | 0.04565 | 0.000 | -0.3923  | -0.0866 |
|          |           |                                     | Black semi cohesive mat             | -.17154  | 0.03423 | 0.000 | -0.2831  | -0.0600 |
|          |           |                                     | Floccules                           | -0.12050 | 0.04749 | 0.229 | -0.2716  | 0.0306  |
|          |           |                                     | Network on bulbous mat              | -.23971  | 0.05076 | 0.001 | -0.4043  | -0.0751 |
|          |           |                                     | Carpet                              | -.17621  | 0.04821 | 0.013 | -0.3301  | -0.0223 |
|          |           |                                     | Orange gel mat                      | 0.09734  | 0.05006 | 0.585 | -0.0609  | 0.2556  |
|          |           |                                     | Orange gel mat with black pinnacles | .23283   | 0.06636 | 0.041 | 0.0063   | 0.4594  |
|          |           |                                     | Orange/brown bulbous mat            | -.17937  | 0.04329 | 0.003 | -0.3175  | -0.0412 |
|          |           | Black domes                         | Black semi cohesive mat             | -8.0417  | 33.3553 | 1.000 | -112.269 | 96.185  |
|          |           |                                     | Floccules                           | 21.4917  | 23.5858 | 0.992 | -52.208  | 95.191  |
|          |           |                                     | Network on bulbous mat              | 5.7160   | 25.5035 | 1.000 | -73.976  | 85.408  |
|          |           |                                     | Carpet                              | 11.1657  | 23.9851 | 1.000 | -63.782  | 86.113  |
|          |           |                                     | Orange gel mat                      | 70.7930  | 22.7208 | 0.051 | -0.204   | 141.790 |
|          |           |                                     | Orange gel mat with black pinnacles | 56.9771  | 27.9070 | 0.516 | -30.226  | 144.180 |
|          |           |                                     | Orange/brown bulbous mat            | 41.2478  | 24.1985 | 0.743 | -34.366  | 116.862 |
|          |           |                                     | spar                                | 8.9072   | 23.8584 | 1.000 | -65.645  | 83.459  |
|          |           | Black semi cohesive mat             | Black domes                         | 8.0417   | 33.3553 | 1.000 | -96.185  | 112.269 |
|          |           |                                     | Floccules                           | 29.5333  | 27.9070 | 0.979 | -57.669  | 116.736 |
|          |           |                                     | Network on bulbous mat              | 13.7577  | 29.5456 | 1.000 | -78.565  | 106.081 |
|          |           |                                     | Carpet                              | 19.2073  | 28.2453 | 0.999 | -69.052  | 107.467 |
|          |           |                                     | Orange gel mat                      | 78.8347  | 27.1800 | 0.093 | -6.096   | 163.765 |
|          |           |                                     | Orange gel mat with black pinnacles | 65.0188  | 31.6436 | 0.506 | -33.860  | 163.897 |
|          |           |                                     | Orange/brown bulbous mat            | 49.2895  | 28.4268 | 0.725 | -39.537  | 138.116 |
|          |           |                                     | Spar                                | 16.9488  | 28.1379 | 1.000 | -70.975  | 104.873 |
|          |           | Floccules                           | Black domes                         | -21.4917 | 23.5858 | 0.992 | -95.191  | 52.208  |
|          |           |                                     | Black semi cohesive mat             | -29.5333 | 27.9070 | 0.979 | -116.736 | 57.669  |
|          |           |                                     | Network on bulbous mat              | -15.7756 | 17.7948 | 0.994 | -71.380  | 39.829  |
|          |           |                                     | Carpet                              | -10.3260 | 15.5406 | 0.999 | -58.887  | 38.235  |
|          |           |                                     | Orange gel mat                      | 49.3013  | 13.5079 | 0.009 | 7.093    | 91.510  |
|          |           |                                     | Orange gel mat with black pinnacles | 35.4854  | 21.0957 | 0.757 | -30.434  | 101.404 |
|          |           |                                     | Orange/brown bulbous mat            | 19.7561  | 15.8680 | 0.946 | -29.827  | 69.340  |
|          |           |                                     | Spar                                | -12.5845 | 15.3445 | 0.996 | -60.532  | 35.363  |
|          |           | Network on bulbous mat              | Black domes                         | -5.7160  | 25.5035 | 1.000 | -85.408  | 73.976  |
|          |           |                                     | Black semi cohesive mat             | -13.7577 | 29.5456 | 1.000 | -106.081 | 78.565  |
|          |           |                                     | Floccules                           | 15.7756  | 17.7948 | 0.994 | -39.829  | 71.380  |
|          |           |                                     | Carpet                              | 5.4496   | 18.3208 | 1.000 | -51.798  | 62.698  |
|          |           |                                     | Orange gel mat                      | 65.0770  | 16.6314 | 0.004 | 13.108   | 117.046 |
|          |           |                                     | Orange gel mat with black pinnacles | 51.2611  | 23.2201 | 0.403 | -21.296  | 123.818 |

|                                     |  |                                     |          |         |       |          |         |
|-------------------------------------|--|-------------------------------------|----------|---------|-------|----------|---------|
|                                     |  | Orange/brown bulbous mat            | 35.5318  | 18.5993 | 0.607 | -22.587  | 93.650  |
|                                     |  | Spar                                | 3.1911   | 18.1547 | 1.000 | -53.538  | 59.920  |
| Carpet                              |  | Black domes                         | -11.1657 | 23.9851 | 1.000 | -86.113  | 63.782  |
|                                     |  | Black semi cohesive mat             | -19.2073 | 28.2453 | 0.999 | -107.467 | 69.052  |
|                                     |  | Floccules                           | 10.3260  | 15.5406 | 0.999 | -38.235  | 58.887  |
|                                     |  | Network on bulbous mat              | -5.4496  | 18.3208 | 1.000 | -62.698  | 51.798  |
|                                     |  | Orange gel mat                      | 59.6273  | 14.1936 | 0.001 | 15.276   | 103.979 |
|                                     |  | Orange gel mat with black pinnacles | 45.8114  | 21.5413 | 0.457 | -21.500  | 113.123 |
| Orange gel mat                      |  | Orange/brown bulbous mat            | 30.0822  | 16.4557 | 0.663 | -21.338  | 81.502  |
|                                     |  | Spar                                | -2.2585  | 15.9514 | 1.000 | -52.103  | 47.586  |
|                                     |  | Black domes                         | -70.7930 | 22.7208 | 0.051 | -141.790 | 0.204   |
|                                     |  | Black semi cohesive mat             | -78.8347 | 27.1800 | 0.093 | -163.765 | 6.096   |
|                                     |  | Floccules                           | -49.3013 | 13.5079 | 0.009 | -91.510  | -7.093  |
|                                     |  | Network on bulbous mat              | -65.0770 | 16.6314 | 0.004 | -117.046 | -13.108 |
|                                     |  | Carpet                              | -59.6273 | 14.1936 | 0.001 | -103.979 | -15.276 |
|                                     |  | Orange gel mat with black pinnacles | -13.8159 | 20.1241 | 0.999 | -76.699  | 49.067  |
|                                     |  | Orange/brown bulbous mat            | -29.5452 | 14.5513 | 0.523 | -75.014  | 15.924  |
|                                     |  | Spar                                | -61.8858 | 13.9785 | 0.000 | -105.565 | -18.206 |
| Orange gel mat with black pinnacles |  | Black domes                         | -56.9771 | 27.9070 | 0.516 | -144.180 | 30.226  |
|                                     |  | Black semi cohesive mat             | -65.0188 | 31.6436 | 0.506 | -163.897 | 33.860  |
|                                     |  | Floccules                           | -35.4854 | 21.0957 | 0.757 | -101.404 | 30.434  |
|                                     |  | Network on bulbous mat              | -51.2611 | 23.2201 | 0.403 | -123.818 | 21.296  |
|                                     |  | Carpet                              | -45.8114 | 21.5413 | 0.457 | -113.123 | 21.500  |
|                                     |  | Orange gel mat                      | 13.8159  | 20.1241 | 0.999 | -49.067  | 76.699  |
|                                     |  | Orange/brown bulbous mat            | -15.7293 | 21.7786 | 0.998 | -83.782  | 52.324  |
|                                     |  | Spar                                | -48.0699 | 21.4002 | 0.379 | -114.940 | 18.800  |
|                                     |  | Black domes                         | -41.2478 | 24.1985 | 0.743 | -116.862 | 34.366  |
|                                     |  | Black semi cohesive mat             | -49.2895 | 28.4268 | 0.725 | -138.116 | 39.537  |
| Orange/brown bulbous mat            |  | Floccules                           | -19.7561 | 15.8680 | 0.946 | -69.340  | 29.827  |
|                                     |  | Network on bulbous mat              | -35.5318 | 18.5993 | 0.607 | -93.650  | 22.587  |
|                                     |  | Carpet                              | -30.0822 | 16.4557 | 0.663 | -81.502  | 21.338  |
|                                     |  | Orange gel mat                      | 29.5452  | 14.5513 | 0.523 | -15.924  | 75.014  |
|                                     |  | Orange gel mat with black pinnacles | 15.7293  | 21.7786 | 0.998 | -52.324  | 83.782  |
|                                     |  | Spar                                | -32.3406 | 16.2705 | 0.553 | -83.182  | 18.501  |
|                                     |  | Black domes                         | -8.9072  | 23.8584 | 1.000 | -83.459  | 65.645  |
|                                     |  | Black semi cohesive mat             | -16.9488 | 28.1379 | 1.000 | -104.873 | 70.975  |
|                                     |  | Floccules                           | 12.5845  | 15.3445 | 0.996 | -35.363  | 60.532  |
|                                     |  | Network on bulbous mat              | -3.1911  | 18.1547 | 1.000 | -59.920  | 53.538  |
| Spar                                |  | Carpet                              | 2.2585   | 15.9514 | 1.000 | -47.586  | 52.103  |
|                                     |  | Orange gel mat                      | 61.8858  | 13.9785 | 0.000 | 18.206   | 105.565 |
|                                     |  | Orange gel mat with black pinnacles | 48.0699  | 21.4002 | 0.379 | -18.800  | 114.940 |
|                                     |  | Orange/brown bulbous mat            | 32.3406  | 16.2705 | 0.553 | -18.501  | 83.182  |
|                                     |  | Black semi cohesive mat             | -8.0417  | 14.3865 | 1.000 | -58.979  | 42.896  |
|                                     |  | Floccules                           | 21.4917  | 17.3805 | 0.942 | -35.997  | 78.980  |
|                                     |  | Network on bulbous mat              | 5.7160   | 15.8952 | 1.000 | -48.177  | 59.610  |
|                                     |  | Carpet                              | 11.1657  | 18.0064 | 0.999 | -48.205  | 70.536  |
|                                     |  | Orange gel mat                      | 70.7930  | 16.1727 | 0.004 | 16.671   | 124.915 |
|                                     |  | Orange gel mat with black pinnacles | 56.9771  | 18.8271 | 0.105 | -6.575   | 120.529 |
| Games-Howell Black domes            |  | Orange/brown bulbous mat            | 41.2478  | 17.9085 | 0.368 | -17.911  | 100.407 |
|                                     |  | Spar                                | 8.9072   | 13.2543 | 0.998 | -39.238  | 57.052  |
|                                     |  | Black domes                         | 8.0417   | 14.3865 | 1.000 | -42.896  | 58.979  |
|                                     |  | Floccules                           | 29.5333  | 14.0329 | 0.483 | -16.076  | 75.142  |
|                                     |  | Network on bulbous mat              | 13.7577  | 12.1448 | 0.964 | -26.850  | 54.365  |
|                                     |  | Carpet                              | 19.2073  | 14.8010 | 0.927 | -29.025  | 67.440  |
|                                     |  | Orange gel mat                      | 78.8347  | 12.5058 | 0.000 | 38.185   | 119.484 |
|                                     |  | Orange gel mat with black pinnacles | 65.0188  | 15.7892 | 0.012 | 10.581   | 119.456 |
|                                     |  | Orange/brown bulbous mat            | 49.2895  | 14.6817 | 0.040 | 1.310    | 97.269  |
|                                     |  | Spar                                | 16.9488  | 8.3974  | 0.557 | -13.838  | 47.736  |
| Black semi cohesive mat             |  | Black domes                         | -21.4917 | 17.3805 | 0.942 | -78.980  | 35.997  |
|                                     |  | Black semi cohesive mat             | -29.5333 | 14.0329 | 0.483 | -75.142  | 16.076  |
|                                     |  | Network on bulbous mat              | -15.7756 | 15.5758 | 0.983 | -65.605  | 34.054  |
|                                     |  | Carpet                              | -10.3260 | 17.7251 | 1.000 | -66.747  | 46.095  |
|                                     |  | Orange gel mat                      | 49.3013  | 15.8589 | 0.059 | -0.934   | 99.537  |
|                                     |  | Orange gel mat with black pinnacles | 35.4854  | 18.5582 | 0.610 | -25.457  | 96.428  |
|                                     |  | Orange/brown bulbous mat            | 19.7561  | 17.6256 | 0.969 | -36.414  | 75.926  |
|                                     |  | Spar                                | -12.5845 | 12.8696 | 0.987 | -54.013  | 28.844  |
|                                     |  | Black domes                         | -5.7160  | 15.8952 | 1.000 | -59.610  | 48.177  |
|                                     |  | Black semi cohesive mat             | -13.7577 | 12.1448 | 0.964 | -54.365  | 26.850  |
| Floccules                           |  | Floccules                           | 15.7756  | 15.5758 | 0.983 | -34.054  | 65.605  |
|                                     |  | Carpet                              | 5.4496   | 16.2713 | 1.000 | -46.761  | 57.660  |
|                                     |  | Orange gel mat                      | 65.0770  | 14.2155 | 0.001 | 19.722   | 110.432 |
|                                     |  | Orange gel mat with black pinnacles | 51.2611  | 17.1750 | 0.110 | -6.200   | 108.722 |
|                                     |  | Orange/brown bulbous mat            | 35.5318  | 16.1628 | 0.420 | -16.421  | 87.485  |
|                                     |  | Spar                                | 3.1911   | 10.7796 | 1.000 | -32.392  | 38.775  |
|                                     |  | Black domes                         | -11.1657 | 18.0064 | 0.999 | -70.536  | 48.205  |
|                                     |  | Black semi cohesive mat             | -19.2073 | 14.8010 | 0.927 | -67.440  | 29.025  |
|                                     |  | Floccules                           | 10.3260  | 17.7251 | 1.000 | -46.095  | 66.747  |
|                                     |  | Network on bulbous mat              | -5.4496  | 16.2713 | 1.000 | -57.660  | 46.761  |
| Network on bulbous mat              |  | Orange gel mat                      | 59.6273  | 16.5425 | 0.015 | 7.007    | 112.248 |
|                                     |  | Orange gel mat with black pinnacles | 45.8114  | 19.1457 | 0.315 | -16.901  | 108.524 |
|                                     |  | Orange/brown bulbous mat            | 30.0822  | 18.2432 | 0.775 | -28.146  | 88.310  |
|                                     |  | Spar                                | -2.2585  | 13.7031 | 1.000 | -46.704  | 42.187  |
| Carpet                              |  | Black domes                         | -11.1657 | 18.0064 | 0.999 | -70.536  | 48.205  |
|                                     |  | Black semi cohesive mat             | -19.2073 | 14.8010 | 0.927 | -67.440  | 29.025  |
|                                     |  | Floccules                           | 10.3260  | 17.7251 | 1.000 | -46.095  | 66.747  |
|                                     |  | Network on bulbous mat              | -5.4496  | 16.2713 | 1.000 | -57.660  | 46.761  |
|                                     |  | Orange gel mat                      | 59.6273  | 16.5425 | 0.015 | 7.007    | 112.248 |
|                                     |  | Orange gel mat with black pinnacles | 45.8114  | 19.1457 | 0.315 | -16.901  | 108.524 |
|                                     |  | Orange/brown bulbous mat            | 30.0822  | 18.2432 | 0.775 | -28.146  | 88.310  |
|                                     |  | Spar                                | -2.2585  | 13.7031 | 1.000 | -46.704  | 42.187  |



|           |           |                                     |                                     |                       |         |       |          |         |
|-----------|-----------|-------------------------------------|-------------------------------------|-----------------------|---------|-------|----------|---------|
| DO (mg/L) | Tukey HSD | Orange gel mat                      | Black domes                         | -70.7930 <sup>*</sup> | 16.1727 | 0.004 | -124.915 | -16.671 |
|           |           |                                     | Black semi cohesive mat             | -78.8347 <sup>*</sup> | 12.5058 | 0.000 | -119.484 | -38.185 |
|           |           |                                     | Floccules                           | -49.3013              | 15.8589 | 0.059 | -99.537  | 0.934   |
|           |           |                                     | Network on bulbous mat              | -65.0770 <sup>*</sup> | 14.2155 | 0.001 | -110.432 | -19.722 |
|           |           |                                     | Carpet                              | -59.6273 <sup>*</sup> | 16.5425 | 0.015 | -112.248 | -7.007  |
|           |           |                                     | Orange gel mat with black pinnacles | -13.8159              | 17.4322 | 0.996 | -71.578  | 43.946  |
|           |           |                                     | Orange/brown bulbous mat            | -29.5452              | 16.4359 | 0.684 | -81.901  | 22.811  |
|           |           |                                     | Spar                                | -61.8858 <sup>*</sup> | 11.1848 | 0.000 | -97.366  | -26.406 |
|           |           | Orange gel mat with black pinnacles | Black domes                         | -56.9771              | 18.8271 | 0.105 | -120.529 | 6.575   |
|           |           |                                     | Black semi cohesive mat             | -65.0187 <sup>*</sup> | 15.7892 | 0.012 | -119.456 | -10.581 |
|           |           |                                     | Floccules                           | -35.4854              | 18.5582 | 0.610 | -96.428  | 25.457  |
|           |           |                                     | Network on bulbous mat              | -51.2611              | 17.1750 | 0.110 | -108.722 | 6.200   |
|           |           |                                     | Carpet                              | -45.8114              | 19.1457 | 0.315 | -108.524 | 16.901  |
|           |           |                                     | Orange gel mat                      | 13.8159               | 17.4322 | 0.996 | -43.946  | 71.578  |
|           |           |                                     | Orange/brown bulbous mat            | -15.7293              | 19.0536 | 0.995 | -78.233  | 46.775  |
|           |           |                                     | Spar                                | -48.0699              | 14.7649 | 0.080 | -99.787  | 3.647   |
|           |           | Orange/brown bulbous mat            | Black domes                         | -41.2478              | 17.9085 | 0.368 | -100.407 | 17.911  |
|           |           |                                     | Black semi cohesive mat             | -49.2895 <sup>*</sup> | 14.6817 | 0.040 | -97.269  | -1.310  |
|           |           |                                     | Floccules                           | -19.7561              | 17.6256 | 0.969 | -75.926  | 36.414  |
|           |           |                                     | Network on bulbous mat              | -35.5318              | 16.1628 | 0.420 | -87.485  | 16.421  |
|           |           |                                     | Carpet                              | -30.0822              | 18.2432 | 0.775 | -88.310  | 28.146  |
|           |           |                                     | Orange gel mat                      | 29.5452               | 16.4359 | 0.684 | -22.811  | 81.901  |
|           |           |                                     | Orange gel mat with black pinnacles | 15.7293               | 19.0536 | 0.995 | -46.775  | 78.233  |
|           |           |                                     | Spar                                | -32.3406              | 13.5742 | 0.318 | -76.517  | 11.836  |
|           |           | Spar                                | Black domes                         | -8.9072               | 13.2543 | 0.998 | -57.052  | 39.238  |
|           |           |                                     | Black semi cohesive mat             | -16.9488              | 8.3974  | 0.557 | -47.736  | 13.838  |
|           |           |                                     | Floccules                           | 12.5845               | 12.8696 | 0.987 | -28.844  | 54.013  |
|           |           |                                     | Network on bulbous mat              | -3.1911               | 10.7796 | 1.000 | -38.775  | 32.392  |
|           |           |                                     | Carpet                              | 2.2585                | 13.7031 | 1.000 | -42.187  | 46.704  |
|           |           |                                     | Orange gel mat                      | 61.8858 <sup>*</sup>  | 11.1848 | 0.000 | 26.406   | 97.366  |
|           |           |                                     | Orange gel mat with black pinnacles | 48.0699               | 14.7649 | 0.080 | -3.647   | 99.787  |
|           |           |                                     | Orange/brown bulbous mat            | 32.3406               | 13.5742 | 0.318 | -11.836  | 76.517  |
|           |           | Black domes                         | Black semi cohesive mat             | -0.27167              | 0.56516 | 1.000 | -2.0376  | 1.4943  |
|           |           |                                     | Floccules                           | 0.03187               | 0.39963 | 1.000 | -1.2169  | 1.2806  |
|           |           |                                     | Network on bulbous mat              | -0.52667              | 0.43212 | 0.952 | -1.8769  | 0.8236  |
|           |           |                                     | Carpet                              | 0.25467               | 0.40639 | 0.999 | -1.0152  | 1.5246  |
|           |           |                                     | Orange gel mat                      | 0.82847               | 0.38497 | 0.440 | -0.3745  | 2.0314  |
|           |           |                                     | Orange gel mat with black pinnacles | 1.31771               | 0.47285 | 0.124 | -0.1598  | 2.7952  |
|           |           |                                     | Orange/brown bulbous mat            | -0.56535              | 0.41001 | 0.905 | -1.8465  | 0.7158  |
|           |           |                                     | spar                                | 1.51205 <sup>*</sup>  | 0.40425 | 0.007 | 0.2489   | 2.7752  |
|           |           | Black semi cohesive mat             | Black domes                         | 0.27167               | 0.56516 | 1.000 | -1.4943  | 2.0376  |
|           |           |                                     | Floccules                           | 0.30354               | 0.47285 | 0.999 | -1.1740  | 1.7811  |
|           |           |                                     | Network on bulbous mat              | -0.25500              | 0.50061 | 1.000 | -1.8193  | 1.3093  |
|           |           |                                     | Carpet                              | 0.52634               | 0.47858 | 0.974 | -0.9691  | 2.0218  |
|           |           |                                     | Orange gel mat                      | 1.10013               | 0.46053 | 0.294 | -0.3389  | 2.5392  |
|           |           |                                     | Orange gel mat with black pinnacles | 1.58938               | 0.53616 | 0.078 | -0.0860  | 3.2647  |
|           |           |                                     | Orange/brown bulbous mat            | -0.29368              | 0.48165 | 1.000 | -1.7987  | 1.2114  |
|           |           |                                     | Spar                                | 1.78372 <sup>*</sup>  | 0.47676 | 0.007 | 0.2940   | 3.2735  |
|           |           | Floccules                           | Black domes                         | -0.03187              | 0.39963 | 1.000 | -1.2806  | 1.2169  |
|           |           |                                     | Black semi cohesive mat             | -0.30354              | 0.47285 | 0.999 | -1.7811  | 1.1740  |
|           |           |                                     | Network on bulbous mat              | -0.55854              | 0.30151 | 0.647 | -1.5007  | 0.3836  |
|           |           |                                     | Carpet                              | 0.22280               | 0.26331 | 0.995 | -0.6000  | 1.0456  |
|           |           |                                     | Orange gel mat                      | .79659 <sup>*</sup>   | 0.22887 | 0.017 | 0.0814   | 1.5118  |
|           |           |                                     | Orange gel mat with black pinnacles | 1.28583 <sup>*</sup>  | 0.35744 | 0.011 | 0.1689   | 2.4027  |
|           |           |                                     | Orange/brown bulbous mat            | -0.59723              | 0.26886 | 0.395 | -1.4374  | 0.2429  |
|           |           |                                     | Spar                                | 1.48018 <sup>*</sup>  | 0.25999 | 0.000 | 0.6678   | 2.2926  |
|           |           | Network on bulbous mat              | Black domes                         | 0.52667               | 0.43212 | 0.952 | -0.8236  | 1.8769  |
|           |           |                                     | Black semi cohesive mat             | 0.25500               | 0.50061 | 1.000 | -1.3093  | 1.8193  |
|           |           |                                     | Floccules                           | 0.55854               | 0.30151 | 0.647 | -0.3836  | 1.5007  |
|           |           |                                     | Carpet                              | 0.78134               | 0.31042 | 0.228 | -0.1886  | 1.7513  |
|           |           |                                     | Orange gel mat                      | 1.35513 <sup>*</sup>  | 0.28180 | 0.000 | 0.4746   | 2.2357  |
|           |           |                                     | Orange gel mat with black pinnacles | 1.84437 <sup>*</sup>  | 0.39343 | 0.000 | 0.6150   | 3.0738  |
|           |           |                                     | Orange/brown bulbous mat            | -0.03868              | 0.31514 | 1.000 | -1.0234  | 0.9460  |
|           |           |                                     | Spar                                | 2.03872 <sup>*</sup>  | 0.30761 | 0.000 | 1.0775   | 2.9999  |
|           |           | Carpet                              | Black domes                         | -0.25467              | 0.40639 | 0.999 | -1.5246  | 1.0152  |
|           |           |                                     | Black semi cohesive mat             | -0.52634              | 0.47858 | 0.974 | -2.0218  | 0.9691  |
|           |           |                                     | Floccules                           | -0.22280              | 0.26331 | 0.995 | -1.0456  | 0.6000  |
|           |           |                                     | Network on bulbous mat              | -0.78134              | 0.31042 | 0.228 | -1.7513  | 0.1886  |
|           |           |                                     | Orange gel mat                      | 0.57379               | 0.24049 | 0.296 | -0.1777  | 1.3253  |
|           |           |                                     | Orange gel mat with black pinnacles | 1.06303               | 0.36499 | 0.090 | -0.0775  | 2.2035  |
|           |           |                                     | Orange/brown bulbous mat            | -0.82003              | 0.27882 | 0.083 | -1.6913  | 0.0512  |
|           |           |                                     | Spar                                | 1.25738 <sup>*</sup>  | 0.27027 | 0.000 | 0.4128   | 2.1019  |
|           |           | Orange gel mat                      | Black domes                         | -0.82847              | 0.38497 | 0.440 | -2.0314  | 0.3745  |
|           |           |                                     | Black semi cohesive mat             | -1.10013              | 0.46053 | 0.294 | -2.5392  | 0.3389  |
|           |           |                                     | Floccules                           | -.79659 <sup>*</sup>  | 0.22887 | 0.017 | -1.5118  | -0.0814 |
|           |           |                                     | Network on bulbous mat              | -1.35513 <sup>*</sup> | 0.28180 | 0.000 | -2.2357  | -0.4746 |
|           |           |                                     | Carpet                              | -0.57379              | 0.24049 | 0.296 | -1.3253  | 0.1777  |
|           |           |                                     | Orange gel mat with black pinnacles | 0.48924               | 0.34097 | 0.884 | -0.5762  | 1.5547  |
|           |           |                                     | Orange/brown bulbous mat            | -1.39382 <sup>*</sup> | 0.24655 | 0.000 | -2.1642  | -0.6234 |
|           |           |                                     | Spar                                | 0.68359               | 0.23685 | 0.096 | -0.0565  | 1.4237  |
|           |           | Orange gel mat with black pinnacles | Black domes                         | -1.31771              | 0.47285 | 0.124 | -2.7952  | 0.1598  |
|           |           |                                     | Black semi cohesive mat             | -1.58938              | 0.53616 | 0.078 | -3.2647  | 0.0860  |

|              |                                     |                                     |          |         |       |         |         |
|--------------|-------------------------------------|-------------------------------------|----------|---------|-------|---------|---------|
| Games-Howell | Orange/brown bulbous mat            | Floccules                           | -1.28583 | 0.35744 | 0.011 | -2.4027 | -0.1689 |
|              |                                     | Network on bulbous mat              | -1.84437 | 0.39343 | 0.000 | -3.0738 | -0.6150 |
|              |                                     | Carpet                              | -1.06303 | 0.36499 | 0.090 | -2.2035 | 0.0775  |
|              |                                     | Orange gel mat                      | -0.48924 | 0.34097 | 0.884 | -1.5547 | 0.5762  |
|              |                                     | Orange/brown bulbous mat            | -1.88306 | 0.36901 | 0.000 | -3.0361 | -0.7300 |
|              | Spar                                | Spar                                | 0.19435  | 0.36260 | 1.000 | -0.9387 | 1.3274  |
|              |                                     | Black domes                         | 0.56535  | 0.41001 | 0.905 | -0.7158 | 1.8465  |
|              |                                     | Black semi cohesive mat             | 0.29368  | 0.48165 | 1.000 | -1.2114 | 1.7987  |
|              |                                     | Floccules                           | 0.59723  | 0.26886 | 0.395 | -0.2429 | 1.4374  |
|              |                                     | Network on bulbous mat              | 0.03868  | 0.31514 | 1.000 | -0.9460 | 1.0234  |
|              | Orange gel mat with black pinnacles | Carpet                              | 0.82003  | 0.27882 | 0.083 | -0.0512 | 1.6913  |
|              |                                     | Orange gel mat                      | 1.39382  | 0.24655 | 0.000 | 0.6234  | 2.1642  |
|              |                                     | Orange gel mat with black pinnacles | 1.88306  | 0.36901 | 0.000 | 0.7300  | 3.0361  |
|              |                                     | Spar                                | 2.07741  | 0.27568 | 0.000 | 1.2160  | 2.9388  |
|              |                                     | Black domes                         | -1.51205 | 0.40425 | 0.007 | -2.7752 | -0.2489 |
| Games-Howell | Spar                                | Black semi cohesive mat             | -1.78372 | 0.47676 | 0.007 | -3.2735 | -0.2940 |
|              |                                     | Floccules                           | -1.48018 | 0.25999 | 0.000 | -2.2926 | -0.6678 |
|              |                                     | Network on bulbous mat              | -2.03872 | 0.30761 | 0.000 | -2.9999 | -1.0775 |
|              |                                     | Carpet                              | -1.25738 | 0.27027 | 0.000 | -2.1019 | -0.4128 |
|              |                                     | Orange gel mat                      | -0.68359 | 0.23685 | 0.096 | -1.4237 | 0.0565  |
|              | Orange gel mat with black pinnacles | Orange gel mat with black pinnacles | -0.19435 | 0.36260 | 1.000 | -1.3274 | 0.9387  |
|              |                                     | Orange/brown bulbous mat            | -2.07741 | 0.27568 | 0.000 | -2.9388 | -1.2160 |
|              |                                     | Black semi cohesive mat             | -0.27167 | 0.48348 | 0.999 | -2.1128 | 1.5695  |
|              |                                     | Floccules                           | 0.03187  | 0.29325 | 1.000 | -0.9460 | 1.0097  |
|              |                                     | Network on bulbous mat              | -0.52667 | 0.28936 | 0.669 | -1.5014 | 0.4480  |
|              | Carpet                              | Carpet                              | 0.25467  | 0.26309 | 0.985 | -0.6497 | 1.1590  |
|              |                                     | Orange gel mat                      | 0.82847  | 0.29420 | 0.150 | -0.1487 | 1.8056  |
|              |                                     | Orange gel mat with black pinnacles | 1.31771  | 0.40903 | 0.072 | -0.0713 | 2.7068  |
|              |                                     | Orange/brown bulbous mat            | -0.56535 | 0.28342 | 0.560 | -1.5196 | 0.3889  |
|              |                                     | Spar                                | 1.51205  | 0.23676 | 0.000 | 0.6589  | 2.3652  |
|              | Black semi cohesive mat             | Black domes                         | 0.27167  | 0.48348 | 0.999 | -1.5695 | 2.1128  |
|              |                                     | Floccules                           | 0.30354  | 0.47205 | 0.999 | -1.5167 | 2.1238  |
|              |                                     | Network on bulbous mat              | -0.25500 | 0.46964 | 1.000 | -2.0757 | 1.5657  |
|              |                                     | Carpet                              | 0.52634  | 0.45393 | 0.947 | -1.2879 | 2.3405  |
|              |                                     | Orange gel mat                      | 1.10013  | 0.47264 | 0.405 | -0.7196 | 2.9198  |
|              | Orange gel mat with black pinnacles | Orange gel mat with black pinnacles | 1.58938  | 0.55149 | 0.166 | -0.3755 | 3.5543  |
|              |                                     | Orange/brown bulbous mat            | -0.29368 | 0.46600 | 0.999 | -2.1111 | 1.5238  |
|              |                                     | Spar                                | 1.78372  | 0.43919 | 0.055 | -0.0345 | 3.6019  |
|              |                                     | Black domes                         | -0.03187 | 0.29325 | 1.000 | -1.0097 | 0.9460  |
|              |                                     | Black semi cohesive mat             | -0.30354 | 0.47205 | 0.999 | -2.1238 | 1.5167  |
| Games-Howell | Floccules                           | Network on bulbous mat              | -0.55854 | 0.26982 | 0.502 | -1.4236 | 0.3065  |
|              |                                     | Carpet                              | 0.22280  | 0.24143 | 0.991 | -0.5461 | 0.9917  |
|              |                                     | Orange gel mat                      | 0.79659  | 0.27501 | 0.100 | -0.0728 | 1.6660  |
|              |                                     | Orange gel mat with black pinnacles | 1.28583  | 0.39544 | 0.067 | -0.0526 | 2.6243  |
|              |                                     | Orange/brown bulbous mat            | -0.59723 | 0.26343 | 0.374 | -1.4361 | 0.2416  |
|              | Spar                                | Spar                                | 1.48018  | 0.21244 | 0.000 | 0.7986  | 2.1618  |
|              |                                     | Black domes                         | 0.52667  | 0.28936 | 0.669 | -0.4480 | 1.5014  |
|              |                                     | Black semi cohesive mat             | 0.25500  | 0.46964 | 1.000 | -1.5657 | 2.0757  |
|              |                                     | Floccules                           | 0.55854  | 0.26982 | 0.502 | -0.3065 | 1.4236  |
|              |                                     | Carpet                              | .78134   | 0.23669 | 0.042 | 0.0154  | 1.5473  |
|              | Network on bulbous mat              | Orange gel mat                      | 1.35513  | 0.27086 | 0.000 | 0.4908  | 2.2194  |
|              |                                     | Orange gel mat with black pinnacles | 1.84437  | 0.39257 | 0.002 | 0.5098  | 3.1789  |
|              |                                     | Orange/brown bulbous mat            | -0.03868 | 0.25910 | 1.000 | -0.8732 | 0.7959  |
|              |                                     | Spar                                | 2.03872  | 0.20704 | 0.000 | 1.3560  | 2.7214  |
|              |                                     | Black domes                         | -0.25467 | 0.26309 | 0.985 | -1.1590 | 0.6497  |
| Games-Howell | Carpet                              | Black semi cohesive mat             | -0.52634 | 0.45393 | 0.947 | -2.3405 | 1.2879  |
|              |                                     | Floccules                           | -0.22280 | 0.24143 | 0.991 | -0.9917 | 0.5461  |
|              |                                     | Network on bulbous mat              | -.78134  | 0.23669 | 0.042 | -1.5473 | -0.0154 |
|              |                                     | Orange gel mat                      | 0.57379  | 0.24259 | 0.313 | -0.1933 | 1.3409  |
|              |                                     | Orange gel mat with black pinnacles | 1.06303  | 0.37363 | 0.161 | -0.2271 | 2.3532  |
|              | Orange/brown bulbous mat            | Orange/brown bulbous mat            | -.82003  | 0.22939 | 0.017 | -1.5535 | -0.0866 |
|              |                                     | Spar                                | 1.25738  | 0.16837 | 0.000 | 0.7175  | 1.7973  |
|              |                                     | Black domes                         | -0.82847 | 0.29420 | 0.150 | -1.8056 | 0.1487  |
|              |                                     | Black semi cohesive mat             | -1.10013 | 0.47264 | 0.405 | -2.9198 | 0.7196  |
|              |                                     | Floccules                           | -0.79659 | 0.27501 | 0.100 | -1.6660 | 0.0728  |
|              | Orange gel mat                      | Network on bulbous mat              | -1.35513 | 0.27086 | 0.000 | -2.2194 | -0.4908 |
|              |                                     | Carpet                              | -0.57379 | 0.24259 | 0.313 | -1.3409 | 0.1933  |
|              |                                     | Orange gel mat with black pinnacles | 0.48924  | 0.39615 | 0.941 | -0.8495 | 1.8280  |
|              |                                     | Orange/brown bulbous mat            | -1.39382 | 0.26450 | 0.000 | -2.2318 | -0.5559 |
|              |                                     | Spar                                | .68359   | 0.21375 | 0.046 | 0.0057  | 1.3614  |
|              | Orange gel mat with black pinnacles | Black domes                         | -1.31771 | 0.40903 | 0.072 | -2.7068 | 0.0713  |
|              |                                     | Black semi cohesive mat             | -1.58938 | 0.55149 | 0.166 | -3.5543 | 0.3755  |
|              |                                     | Floccules                           | -1.28583 | 0.39544 | 0.067 | -2.6243 | 0.0526  |
|              |                                     | Network on bulbous mat              | -1.84437 | 0.39257 | 0.002 | -3.1789 | -0.5098 |
|              |                                     | Carpet                              | -1.06303 | 0.37363 | 0.161 | -2.3532 | 0.2271  |
| Games-Howell | Orange gel mat                      | Orange gel mat                      | -0.48924 | 0.39615 | 0.941 | -1.8280 | 0.8495  |
|              |                                     | Orange/brown bulbous mat            | -1.88306 | 0.38821 | 0.002 | -3.2055 | -0.5607 |
|              |                                     | Spar                                | 0.19435  | 0.35558 | 1.000 | -1.0609 | 1.4496  |
|              |                                     | Black domes                         | 0.56535  | 0.28342 | 0.560 | -0.3889 | 1.5196  |
|              |                                     | Black semi cohesive mat             | 0.29368  | 0.46600 | 0.999 | -1.5238 | 2.1111  |
|              | Orange/brown bulbous mat            | Floccules                           | 0.59723  | 0.26343 | 0.374 | -0.2416 | 1.4361  |
|              |                                     | Network on bulbous mat              | 0.03868  | 0.25910 | 1.000 | -0.7959 | 0.8732  |

|            |           |                                     |                                     |                       |         |       |         |         |
|------------|-----------|-------------------------------------|-------------------------------------|-----------------------|---------|-------|---------|---------|
|            |           |                                     | Carpet                              | .82003 <sup>*</sup>   | 0.22939 | 0.017 | 0.0866  | 1.5535  |
|            |           |                                     | Orange gel mat                      | 1.39382 <sup>*</sup>  | 0.26450 | 0.000 | 0.5559  | 2.2318  |
|            |           |                                     | Orange gel mat with black pinnacles | 1.88306 <sup>*</sup>  | 0.38821 | 0.002 | 0.5607  | 3.2055  |
|            |           |                                     | Spar                                | 2.07741 <sup>*</sup>  | 0.19864 | 0.000 | 1.4357  | 2.7192  |
|            |           | Spar                                | Black domes                         | -1.51205 <sup>*</sup> | 0.23676 | 0.000 | -2.3652 | -0.6589 |
|            |           |                                     | Black semi cohesive mat             | -1.78372 <sup>*</sup> | 0.43919 | 0.055 | -3.6019 | 0.0345  |
|            |           |                                     | Floccules                           | -1.48018 <sup>*</sup> | 0.21244 | 0.000 | -2.1618 | -0.7986 |
|            |           |                                     | Network on bulbous mat              | -2.03872 <sup>*</sup> | 0.20704 | 0.000 | -2.7214 | -1.3560 |
|            |           |                                     | Carpet                              | -1.25738 <sup>*</sup> | 0.16837 | 0.000 | -1.7973 | -0.7175 |
|            |           |                                     | Orange gel mat                      | -.68359 <sup>*</sup>  | 0.21375 | 0.046 | -1.3614 | -0.0057 |
|            |           |                                     | Orange gel mat with black pinnacles | -0.19435 <sup>*</sup> | 0.35558 | 1.000 | -1.4496 | 1.0609  |
|            |           |                                     | Orange/brown bulbous mat            | -2.07741 <sup>*</sup> | 0.19864 | 0.000 | -2.7192 | -1.4357 |
| Depth (cm) | Tukey HSD | Black domes                         | Black semi cohesive mat             | 9.167 <sup>*</sup>    | 5.431   | 0.754 | -7.80   | 26.14   |
|            |           |                                     | Floccules                           | 6.875 <sup>*</sup>    | 3.840   | 0.689 | -5.13   | 18.88   |
|            |           |                                     | Network on bulbous mat              | 8.301 <sup>*</sup>    | 4.153   | 0.545 | -4.67   | 21.28   |
|            |           |                                     | Carpet                              | 5.173 <sup>*</sup>    | 3.905   | 0.923 | -7.03   | 17.38   |
|            |           |                                     | Orange gel mat                      | -5.303 <sup>*</sup>   | 3.699   | 0.884 | -16.86  | 6.26    |
|            |           |                                     | Orange gel mat with black pinnacles | -13.021 <sup>*</sup>  | 4.544   | 0.101 | -27.22  | 1.18    |
|            |           |                                     | Orange/brown bulbous mat            | 5.680 <sup>*</sup>    | 3.940   | 0.881 | -6.63   | 17.99   |
|            |           |                                     | spar                                | -5.397 <sup>*</sup>   | 3.885   | 0.901 | -17.54  | 6.74    |
|            |           | Black semi cohesive mat             | Black domes                         | -9.167 <sup>*</sup>   | 5.431   | 0.754 | -26.14  | 7.80    |
|            |           |                                     | Floccules                           | -2.292 <sup>*</sup>   | 4.544   | 1.000 | -16.49  | 11.91   |
|            |           |                                     | Network on bulbous mat              | -0.865 <sup>*</sup>   | 4.811   | 1.000 | -15.90  | 14.17   |
|            |           |                                     | Carpet                              | -3.994 <sup>*</sup>   | 4.599   | 0.994 | -18.36  | 10.38   |
|            |           |                                     | Orange gel mat                      | -14.470 <sup>*</sup>  | 4.426   | 0.032 | -28.30  | -0.64   |
|            |           |                                     | Orange gel mat with black pinnacles | -22.187 <sup>*</sup>  | 5.152   | 0.001 | -38.29  | -6.09   |
|            |           |                                     | Orange/brown bulbous mat            | -3.487 <sup>*</sup>   | 4.629   | 0.998 | -17.95  | 10.98   |
|            |           |                                     | Spar                                | -14.564 <sup>*</sup>  | 4.582   | 0.043 | -28.88  | -0.25   |
|            |           | Floccules                           | Black domes                         | -6.875 <sup>*</sup>   | 3.840   | 0.689 | -18.88  | 5.13    |
|            |           |                                     | Black semi cohesive mat             | 2.292 <sup>*</sup>    | 4.544   | 1.000 | -11.91  | 16.49   |
|            |           |                                     | Network on bulbous mat              | 1.426 <sup>*</sup>    | 2.897   | 1.000 | -7.63   | 10.48   |
|            |           |                                     | Carpet                              | -1.702 <sup>*</sup>   | 2.530   | 0.999 | -9.61   | 6.20    |
|            |           |                                     | Orange gel mat                      | -12.178 <sup>*</sup>  | 2.199   | 0.000 | -19.05  | -5.31   |
|            |           |                                     | Orange gel mat with black pinnacles | -19.896 <sup>*</sup>  | 3.435   | 0.000 | -30.63  | -9.16   |
|            |           |                                     | Orange/brown bulbous mat            | -1.195 <sup>*</sup>   | 2.584   | 1.000 | -9.27   | 6.88    |
|            |           |                                     | Spar                                | -12.272 <sup>*</sup>  | 2.498   | 0.000 | -20.08  | -4.47   |
|            |           | Network on bulbous mat              | Black domes                         | -8.301 <sup>*</sup>   | 4.153   | 0.545 | -21.28  | 4.67    |
|            |           |                                     | Black semi cohesive mat             | 0.865 <sup>*</sup>    | 4.811   | 1.000 | -14.17  | 15.90   |
|            |           |                                     | Floccules                           | -1.426 <sup>*</sup>   | 2.897   | 1.000 | -10.48  | 7.63    |
|            |           |                                     | Carpet                              | -3.129 <sup>*</sup>   | 2.983   | 0.981 | -12.45  | 6.19    |
|            |           |                                     | Orange gel mat                      | -13.605 <sup>*</sup>  | 2.708   | 0.000 | -22.07  | -5.14   |
|            |           |                                     | Orange gel mat with black pinnacles | -21.322 <sup>*</sup>  | 3.781   | 0.000 | -33.14  | -9.51   |
|            |           |                                     | Orange/brown bulbous mat            | -2.621 <sup>*</sup>   | 3.028   | 0.995 | -12.08  | 6.84    |
|            |           |                                     | Spar                                | -13.699 <sup>*</sup>  | 2.956   | 0.000 | -22.94  | -4.46   |
|            |           | Carpet                              | Black domes                         | -5.173 <sup>*</sup>   | 3.905   | 0.923 | -17.38  | 7.03    |
|            |           |                                     | Black semi cohesive mat             | 3.994 <sup>*</sup>    | 4.599   | 0.994 | -10.38  | 18.36   |
|            |           |                                     | Floccules                           | 1.702 <sup>*</sup>    | 2.530   | 0.999 | -6.20   | 9.61    |
|            |           |                                     | Network on bulbous mat              | 3.129 <sup>*</sup>    | 2.983   | 0.981 | -6.19   | 12.45   |
|            |           |                                     | Orange gel mat                      | -10.476 <sup>*</sup>  | 2.311   | 0.000 | -17.70  | -3.25   |
|            |           |                                     | Orange gel mat with black pinnacles | -18.194 <sup>*</sup>  | 3.507   | 0.000 | -29.15  | -7.23   |
|            |           |                                     | Orange/brown bulbous mat            | 0.507 <sup>*</sup>    | 2.679   | 1.000 | -7.87   | 8.88    |
|            |           |                                     | Spar                                | -10.570 <sup>*</sup>  | 2.597   | 0.002 | -18.69  | -2.45   |
|            |           | Orange gel mat                      | Black domes                         | 5.303 <sup>*</sup>    | 3.699   | 0.884 | -6.26   | 16.86   |
|            |           |                                     | Black semi cohesive mat             | 14.470 <sup>*</sup>   | 4.426   | 0.032 | 0.64    | 28.30   |
|            |           |                                     | Floccules                           | 12.178 <sup>*</sup>   | 2.199   | 0.000 | 5.31    | 19.05   |
|            |           |                                     | Network on bulbous mat              | 13.605 <sup>*</sup>   | 2.708   | 0.000 | 5.14    | 22.07   |
|            |           |                                     | Carpet                              | 10.476 <sup>*</sup>   | 2.311   | 0.000 | 3.25    | 17.70   |
|            |           |                                     | Orange gel mat with black pinnacles | -7.718 <sup>*</sup>   | 3.277   | 0.313 | -17.96  | 2.52    |
|            |           |                                     | Orange/brown bulbous mat            | 10.983 <sup>*</sup>   | 2.369   | 0.000 | 3.58    | 18.39   |
|            |           |                                     | Spar                                | -0.094 <sup>*</sup>   | 2.276   | 1.000 | -7.21   | 7.02    |
|            |           | Orange gel mat with black pinnacles | Black domes                         | 13.021 <sup>*</sup>   | 4.544   | 0.101 | -1.18   | 27.22   |
|            |           |                                     | Black semi cohesive mat             | 22.188 <sup>*</sup>   | 5.152   | 0.001 | 6.09    | 38.29   |
|            |           |                                     | Floccules                           | 19.896 <sup>*</sup>   | 3.435   | 0.000 | 9.16    | 30.63   |
|            |           |                                     | Network on bulbous mat              | 21.322 <sup>*</sup>   | 3.781   | 0.000 | 9.51    | 33.14   |
|            |           |                                     | Carpet                              | 18.194 <sup>*</sup>   | 3.507   | 0.000 | 7.23    | 29.15   |
|            |           |                                     | Orange gel mat                      | 7.718 <sup>*</sup>    | 3.277   | 0.313 | -2.52   | 17.96   |
|            |           |                                     | Orange/brown bulbous mat            | 18.701 <sup>*</sup>   | 3.546   | 0.000 | 7.62    | 29.78   |
|            |           |                                     | Spar                                | 7.624 <sup>*</sup>    | 3.484   | 0.416 | -3.26   | 18.51   |
|            |           | Orange/brown bulbous mat            | Black domes                         | -5.680 <sup>*</sup>   | 3.940   | 0.881 | -17.99  | 6.63    |
|            |           |                                     | Black semi cohesive mat             | 3.487 <sup>*</sup>    | 4.629   | 0.998 | -10.98  | 17.95   |
|            |           |                                     | Floccules                           | 1.195 <sup>*</sup>    | 2.584   | 1.000 | -6.88   | 9.27    |
|            |           |                                     | Network on bulbous mat              | 2.621 <sup>*</sup>    | 3.028   | 0.995 | -6.84   | 12.08   |
|            |           |                                     | Carpet                              | -0.507 <sup>*</sup>   | 2.679   | 1.000 | -8.88   | 7.87    |
|            |           |                                     | Orange gel mat                      | -10.983 <sup>*</sup>  | 2.369   | 0.000 | -18.39  | -3.58   |
|            |           |                                     | Orange gel mat with black pinnacles | -18.701 <sup>*</sup>  | 3.546   | 0.000 | -29.78  | -7.62   |
|            |           |                                     | Spar                                | -11.077 <sup>*</sup>  | 2.649   | 0.001 | -19.36  | -2.80   |
|            |           | Spar                                | Black domes                         | 5.397 <sup>*</sup>    | 3.885   | 0.901 | -6.74   | 17.54   |
|            |           |                                     | Black semi cohesive mat             | 14.564 <sup>*</sup>   | 4.582   | 0.043 | 0.25    | 28.88   |
|            |           |                                     | Floccules                           | 12.272 <sup>*</sup>   | 2.498   | 0.000 | 4.47    | 20.08   |
|            |           |                                     | Network on bulbous mat              | 13.699 <sup>*</sup>   | 2.956   | 0.000 | 4.46    | 22.94   |
|            |           |                                     | Carpet                              | 10.570 <sup>*</sup>   | 2.597   | 0.002 | 2.45    | 18.69   |



|                 |                                     |                                     |          |         |       |          |         |
|-----------------|-------------------------------------|-------------------------------------|----------|---------|-------|----------|---------|
| Games-Howell    | Black domes                         | Orange gel mat                      | 0.094    | 2.276   | 1.000 | -7.02    | 7.21    |
|                 |                                     | Orange gel mat with black pinnacles | -7.624   | 3.484   | 0.416 | -18.51   | 3.26    |
|                 |                                     | Orange/brown bulbous mat            | 11.077*  | 2.649   | 0.001 | 2.80     | 19.36   |
|                 |                                     | Black semi cohesive mat             | 9.167    | 5.399   | 0.740 | -9.90    | 28.23   |
|                 |                                     | Floccules                           | 6.875    | 4.153   | 0.763 | -7.89    | 21.64   |
|                 |                                     | Network on bulbous mat              | 8.301    | 4.275   | 0.597 | -6.72    | 23.32   |
|                 |                                     | Carpet                              | 5.173    | 4.285   | 0.945 | -9.84    | 20.19   |
|                 |                                     | Orange gel mat                      | -5.303   | 4.094   | 0.918 | -19.96   | 9.36    |
|                 |                                     | Orange gel mat with black pinnacles | -13.021  | 3.975   | 0.094 | -27.52   | 1.48    |
|                 |                                     | Orange/brown bulbous mat            | 5.680    | 4.246   | 0.906 | -9.26    | 20.62   |
|                 |                                     | Spar                                | -5.397   | 3.981   | 0.896 | -19.89   | 9.10    |
|                 | Black semi cohesive mat             | Black domes                         | -9.167   | 5.399   | 0.740 | -28.23   | 9.90    |
|                 |                                     | Floccules                           | -2.292   | 4.244   | 1.000 | -18.65   | 14.06   |
|                 |                                     | Network on bulbous mat              | -0.865   | 4.364   | 1.000 | -17.35   | 15.62   |
|                 |                                     | Carpet                              | -3.994   | 4.374   | 0.987 | -20.46   | 12.48   |
|                 |                                     | Orange gel mat                      | -14.470  | 4.187   | 0.093 | -30.79   | 1.85    |
|                 |                                     | Orange gel mat with black pinnacles | -22.187* | 4.070   | 0.008 | -38.50   | -5.88   |
|                 |                                     | Orange/brown bulbous mat            | -3.487   | 4.335   | 0.994 | -19.92   | 12.95   |
|                 |                                     | Spar                                | -14.564  | 4.076   | 0.088 | -30.86   | 1.73    |
|                 |                                     | Black domes                         | -6.875   | 4.153   | 0.763 | -21.64   | 7.89    |
|                 |                                     | Black semi cohesive mat             | 2.292    | 4.244   | 1.000 | -14.06   | 18.65   |
|                 | Floccules                           | Network on bulbous mat              | 1.426    | 2.674   | 1.000 | -7.18    | 10.03   |
|                 |                                     | Carpet                              | -1.702   | 2.689   | 0.999 | -10.27   | 6.87    |
|                 |                                     | Orange gel mat                      | -12.178* | 2.374   | 0.000 | -19.69   | -4.67   |
|                 |                                     | Orange gel mat with black pinnacles | -19.896* | 2.160   | 0.000 | -26.85   | -12.94  |
|                 |                                     | Orange/brown bulbous mat            | -1.195   | 2.626   | 1.000 | -9.57    | 7.18    |
|                 |                                     | Spar                                | -12.272* | 2.172   | 0.000 | -19.19   | -5.36   |
|                 |                                     | Black domes                         | -8.301   | 4.275   | 0.597 | -23.32   | 6.72    |
|                 |                                     | Black semi cohesive mat             | 0.865    | 4.364   | 1.000 | -15.62   | 17.35   |
|                 |                                     | Floccules                           | -1.426   | 2.674   | 1.000 | -10.03   | 7.18    |
|                 |                                     | Carpet                              | -3.129   | 2.875   | 0.974 | -12.37   | 6.11    |
|                 | Network on bulbous mat              | Orange gel mat                      | -13.605* | 2.582   | 0.000 | -21.92   | -5.29   |
|                 |                                     | Orange gel mat with black pinnacles | -21.322* | 2.387   | 0.000 | -29.16   | -13.48  |
|                 |                                     | Orange/brown bulbous mat            | -2.621   | 2.816   | 0.990 | -11.69   | 6.45    |
|                 |                                     | Spar                                | -13.699* | 2.398   | 0.000 | -21.51   | -5.89   |
|                 |                                     | Black domes                         | -5.173   | 4.285   | 0.945 | -20.19   | 9.84    |
|                 |                                     | Black semi cohesive mat             | 3.994    | 4.374   | 0.987 | -12.48   | 20.46   |
|                 |                                     | Floccules                           | 1.702    | 2.689   | 0.999 | -6.87    | 10.27   |
|                 |                                     | Network on bulbous mat              | 3.129    | 2.875   | 0.974 | -6.11    | 12.37   |
|                 |                                     | Orange gel mat                      | -10.476* | 2.598   | 0.004 | -18.74   | -2.21   |
|                 |                                     | Orange gel mat with black pinnacles | -18.194* | 2.405   | 0.000 | -25.96   | -10.43  |
|                 | Carpet                              | Orange/brown bulbous mat            | 0.507    | 2.831   | 1.000 | -8.53    | 9.54    |
|                 |                                     | Spar                                | -10.570* | 2.415   | 0.001 | -18.31   | -2.83   |
|                 |                                     | Black domes                         | 5.303    | 4.094   | 0.918 | -9.36    | 19.96   |
|                 |                                     | Black semi cohesive mat             | 14.470   | 4.187   | 0.093 | -1.85    | 30.79   |
|                 |                                     | Floccules                           | 12.178*  | 2.374   | 0.000 | 4.67     | 19.69   |
|                 |                                     | Network on bulbous mat              | 13.605*  | 2.582   | 0.000 | 5.29     | 21.92   |
|                 |                                     | Carpet                              | 10.476*  | 2.598   | 0.004 | 2.21     | 18.74   |
|                 |                                     | Orange gel mat with black pinnacles | -7.718*  | 2.046   | 0.010 | -14.27   | -1.16   |
|                 |                                     | Orange/brown bulbous mat            | 10.983*  | 2.533   | 0.001 | 2.92     | 19.05   |
|                 |                                     | Spar                                | -0.094   | 2.058   | 1.000 | -6.60    | 6.41    |
|                 | Orange gel mat                      | Black domes                         | 13.021   | 3.975   | 0.094 | -1.48    | 27.52   |
|                 |                                     | Black semi cohesive mat             | 22.188*  | 4.070   | 0.008 | 5.88     | 38.50   |
|                 |                                     | Floccules                           | 19.896*  | 2.160   | 0.000 | 12.94    | 26.85   |
|                 |                                     | Network on bulbous mat              | 21.322*  | 2.387   | 0.000 | 13.48    | 29.16   |
|                 |                                     | Carpet                              | 18.194*  | 2.405   | 0.000 | 10.43    | 25.96   |
|                 |                                     | Orange gel mat                      | 7.718*   | 2.046   | 0.010 | 1.16     | 14.27   |
|                 |                                     | Orange/brown bulbous mat            | 18.701*  | 2.334   | 0.000 | 11.15    | 26.25   |
|                 |                                     | Spar                                | 7.624*   | 1.808   | 0.003 | 1.74     | 13.51   |
|                 |                                     | Black domes                         | -5.680   | 4.246   | 0.906 | -20.62   | 9.26    |
|                 |                                     | Black semi cohesive mat             | 3.487    | 4.335   | 0.994 | -12.95   | 19.92   |
|                 | Orange gel mat with black pinnacles | Floccules                           | 1.195    | 2.626   | 1.000 | -7.18    | 9.57    |
|                 |                                     | Network on bulbous mat              | 2.621    | 2.816   | 0.990 | -6.45    | 11.69   |
|                 |                                     | Carpet                              | -0.507   | 2.831   | 1.000 | -9.54    | 8.53    |
|                 |                                     | Orange gel mat                      | -10.983* | 2.533   | 0.001 | -19.05   | -2.92   |
|                 |                                     | Orange gel mat with black pinnacles | -18.701* | 2.334   | 0.000 | -26.25   | -11.15  |
|                 |                                     | Spar                                | -11.077* | 2.345   | 0.000 | -18.60   | -3.55   |
|                 |                                     | Black domes                         | 5.397    | 3.981   | 0.896 | -9.10    | 19.89   |
|                 |                                     | Black semi cohesive mat             | 14.564   | 4.076   | 0.088 | -1.73    | 30.86   |
|                 |                                     | Floccules                           | 12.272*  | 2.172   | 0.000 | 5.36     | 19.19   |
|                 |                                     | Network on bulbous mat              | 13.699*  | 2.398   | 0.000 | 5.89     | 21.51   |
|                 | Orange/brown bulbous mat            | Carpet                              | 10.570*  | 2.415   | 0.001 | 2.83     | 18.31   |
|                 |                                     | Orange gel mat                      | 0.094    | 2.058   | 1.000 | -6.41    | 6.60    |
|                 |                                     | Orange gel mat with black pinnacles | -7.624*  | 1.808   | 0.003 | -13.51   | -1.74   |
|                 |                                     | Orange/brown bulbous mat            | 11.077*  | 2.345   | 0.000 | 3.55     | 18.60   |
|                 |                                     | Black semi cohesive mat             | -9.7208  | 44.3874 | 1.000 | -148.421 | 128.979 |
|                 |                                     | Floccules                           | -47.8083 | 31.3867 | 0.844 | -145.884 | 50.267  |
|                 |                                     | Network on bulbous mat              | 0.2244   | 33.9387 | 1.000 | -105.826 | 106.274 |
|                 |                                     | Carpet                              | -38.3041 | 31.9180 | 0.956 | -138.040 | 61.432  |
|                 |                                     | Orange gel mat                      | -29.4960 | 30.2356 | 0.988 | -123.975 | 64.983  |
|                 |                                     | Orange gel mat with black pinnacles | -4.3583  | 37.1372 | 1.000 | -120.403 | 111.686 |
| Turbidity (FNU) | Tukey HSD                           | Black domes                         |          |         |       |          |         |
|                 |                                     | Black semi cohesive mat             |          |         |       |          |         |
|                 |                                     | Floccules                           |          |         |       |          |         |
|                 |                                     | Network on bulbous mat              |          |         |       |          |         |
|                 |                                     | Carpet                              |          |         |       |          |         |
|                 |                                     | Orange gel mat                      |          |         |       |          |         |

|              |                                     |                                     |          |         |       |          |         |
|--------------|-------------------------------------|-------------------------------------|----------|---------|-------|----------|---------|
|              |                                     | Orange/brown bulbous mat            | -22.0412 | 32.2020 | 0.999 | -122.665 | 78.582  |
|              |                                     | spar                                | 4.1155   | 31.7495 | 1.000 | -95.094  | 103.325 |
|              | Black semi cohesive mat             | Black domes                         | 9.7208   | 44.3874 | 1.000 | -128.979 | 148.421 |
|              |                                     | Floccules                           | -38.0875 | 37.1372 | 0.983 | -154.132 | 77.957  |
|              |                                     | Network on bulbous mat              | 9.9452   | 39.3177 | 1.000 | -112.913 | 132.803 |
|              |                                     | Carpet                              | -28.5832 | 37.5874 | 0.998 | -146.035 | 88.868  |
|              | Orange gel mat                      | Orange gel mat                      | -19.7752 | 36.1696 | 1.000 | -132.796 | 93.246  |
|              |                                     | Orange gel mat with black pinnacles | 5.3625   | 42.1096 | 1.000 | -126.220 | 136.945 |
|              |                                     | Orange/brown bulbous mat            | -12.3204 | 37.8288 | 1.000 | -130.526 | 105.885 |
|              |                                     | Spar                                | 13.8363  | 37.4444 | 1.000 | -103.168 | 130.841 |
|              | Floccules                           | Black domes                         | 47.8083  | 31.3867 | 0.844 | -50.267  | 145.884 |
|              |                                     | Black semi cohesive mat             | 38.0875  | 37.1372 | 0.983 | -77.957  | 154.132 |
|              |                                     | Network on bulbous mat              | 48.0327  | 23.6804 | 0.525 | -25.963  | 122.028 |
|              |                                     | Carpet                              | 9.5043   | 20.6806 | 1.000 | -55.118  | 74.126  |
|              | Orange gel mat                      | Orange gel mat                      | 18.3123  | 17.9755 | 0.984 | -37.857  | 74.481  |
|              |                                     | Orange gel mat with black pinnacles | 43.4500  | 28.0731 | 0.832 | -44.271  | 131.171 |
|              |                                     | Orange/brown bulbous mat            | 25.7671  | 21.1163 | 0.952 | -40.216  | 91.750  |
|              |                                     | Spar                                | 51.9238  | 20.4196 | 0.216 | -11.882  | 115.730 |
|              | Network on bulbous mat              | Black domes                         | -0.2244  | 33.9387 | 1.000 | -106.274 | 105.826 |
|              |                                     | Black semi cohesive mat             | -9.9452  | 39.3177 | 1.000 | -132.803 | 112.913 |
|              |                                     | Floccules                           | -48.0327 | 23.6804 | 0.525 | -122.028 | 25.963  |
|              |                                     | Carpet                              | -38.5284 | 24.3803 | 0.815 | -114.711 | 37.654  |
|              | Orange gel mat                      | Orange gel mat                      | -29.7204 | 22.1322 | 0.917 | -98.878  | 39.437  |
|              |                                     | Orange gel mat with black pinnacles | -4.5827  | 30.9000 | 1.000 | -101.138 | 91.972  |
|              |                                     | Orange/brown bulbous mat            | -22.2656 | 24.7510 | 0.993 | -99.606  | 55.075  |
|              |                                     | Spar                                | 3.8911   | 24.1593 | 1.000 | -71.601  | 79.383  |
|              | Carpet                              | Black domes                         | 38.3041  | 31.9180 | 0.956 | -61.432  | 138.040 |
|              |                                     | Black semi cohesive mat             | 28.5832  | 37.5874 | 0.998 | -88.868  | 146.035 |
|              |                                     | Floccules                           | -9.5043  | 20.6806 | 1.000 | -74.126  | 55.118  |
|              |                                     | Network on bulbous mat              | 38.5284  | 24.3803 | 0.815 | -37.654  | 114.711 |
|              | Orange gel mat                      | Orange gel mat                      | 8.8081   | 18.8881 | 1.000 | -50.212  | 67.829  |
|              |                                     | Orange gel mat with black pinnacles | 33.9457  | 28.6659 | 0.959 | -55.628  | 123.520 |
|              |                                     | Orange/brown bulbous mat            | 16.2628  | 21.8983 | 0.998 | -52.164  | 84.690  |
|              |                                     | Spar                                | 42.4196  | 21.2273 | 0.546 | -23.910  | 108.750 |
|              | Orange gel mat                      | Black domes                         | 29.4960  | 30.2356 | 0.988 | -64.983  | 123.975 |
|              |                                     | Black semi cohesive mat             | 19.7752  | 36.1696 | 1.000 | -93.246  | 132.796 |
|              |                                     | Floccules                           | -18.3123 | 17.9755 | 0.984 | -74.481  | 37.857  |
|              |                                     | Network on bulbous mat              | 29.7204  | 22.1322 | 0.917 | -39.437  | 98.878  |
|              | Orange gel mat with black pinnacles | Carpet                              | -8.8081  | 18.8881 | 1.000 | -67.829  | 50.212  |
|              |                                     | Orange gel mat with black pinnacles | 25.1377  | 26.7800 | 0.991 | -58.543  | 108.819 |
|              |                                     | Orange/brown bulbous mat            | 7.4548   | 19.3641 | 1.000 | -53.053  | 67.963  |
|              |                                     | Spar                                | 33.6115  | 18.6019 | 0.678 | -24.515  | 91.738  |
|              | Orange gel mat with black pinnacles | Black domes                         | 4.3583   | 37.1372 | 1.000 | -111.686 | 120.403 |
|              |                                     | Black semi cohesive mat             | -5.3625  | 42.1096 | 1.000 | -136.945 | 126.220 |
|              |                                     | Floccules                           | -43.4500 | 28.0731 | 0.832 | -131.171 | 44.271  |
|              |                                     | Network on bulbous mat              | 4.5827   | 30.9000 | 1.000 | -91.972  | 101.138 |
|              | Orange/brown bulbous mat            | Carpet                              | -33.9457 | 28.6659 | 0.959 | -123.520 | 55.628  |
|              |                                     | Orange gel mat                      | -25.1377 | 26.7800 | 0.991 | -108.819 | 58.543  |
|              |                                     | Orange/brown bulbous mat            | -17.6829 | 28.9818 | 1.000 | -108.244 | 72.878  |
|              |                                     | Spar                                | 8.4738   | 28.4782 | 1.000 | -80.514  | 97.461  |
|              | Orange gel mat                      | Black domes                         | 22.0412  | 32.2020 | 0.999 | -78.582  | 122.665 |
|              |                                     | Black semi cohesive mat             | 12.3204  | 37.8288 | 1.000 | -105.885 | 130.526 |
|              |                                     | Floccules                           | -25.7671 | 21.1163 | 0.952 | -91.750  | 40.216  |
|              |                                     | Network on bulbous mat              | 22.2656  | 24.7510 | 0.993 | -55.075  | 99.606  |
|              | Carpet                              | Carpet                              | -16.2628 | 21.8983 | 0.998 | -84.690  | 52.164  |
|              |                                     | Orange gel mat                      | -7.4548  | 19.3641 | 1.000 | -67.963  | 53.053  |
|              |                                     | Orange gel mat with black pinnacles | 17.6829  | 28.9818 | 1.000 | -72.878  | 108.244 |
|              |                                     | Spar                                | 26.1567  | 21.6520 | 0.954 | -41.500  | 93.814  |
|              | Spar                                | Black domes                         | -4.1155  | 31.7495 | 1.000 | -103.325 | 95.094  |
|              |                                     | Black semi cohesive mat             | -13.8363 | 37.4444 | 1.000 | -130.841 | 103.168 |
|              |                                     | Floccules                           | -51.9238 | 20.4196 | 0.216 | -115.730 | 11.882  |
|              |                                     | Network on bulbous mat              | -3.8911  | 24.1593 | 1.000 | -79.383  | 71.601  |
|              | Orange/brown bulbous mat            | Carpet                              | -42.4196 | 21.2273 | 0.546 | -108.750 | 23.910  |
|              |                                     | Orange gel mat                      | -33.6115 | 18.6019 | 0.678 | -91.738  | 24.515  |
|              |                                     | Orange gel mat with black pinnacles | -8.4738  | 28.4782 | 1.000 | -97.461  | 80.514  |
|              |                                     | Orange/brown bulbous mat            | -26.1567 | 21.6520 | 0.954 | -93.814  | 41.500  |
| Games-Howell | Black domes                         | Black semi cohesive mat             | -9.7208  | 6.1453  | 0.792 | -34.933  | 15.491  |
|              |                                     | Floccules                           | -47.8083 | 12.0009 | 0.006 | -86.765  | -8.852  |
|              |                                     | Network on bulbous mat              | 0.2244   | 2.4580  | 1.000 | -7.884   | 8.332   |
|              |                                     | Carpet                              | -38.3041 | 22.8647 | 0.757 | -113.200 | 36.592  |
|              | Orange gel mat                      | Orange gel mat                      | -29.4960 | 14.3149 | 0.507 | -75.211  | 16.219  |
|              |                                     | Orange gel mat with black pinnacles | -4.3583  | 4.9396  | 0.991 | -21.698  | 12.981  |
|              |                                     | Orange/brown bulbous mat            | -22.0412 | 19.0388 | 0.960 | -84.668  | 40.586  |
|              |                                     | Spar                                | 4.1155   | 1.7164  | 0.335 | -1.798   | 10.029  |
|              | Black semi cohesive mat             | Black domes                         | 9.7208   | 6.1453  | 0.792 | -15.491  | 34.933  |
|              |                                     | Floccules                           | -38.0875 | 13.3267 | 0.124 | -81.222  | 5.047   |
|              |                                     | Network on bulbous mat              | 9.9452   | 6.2945  | 0.794 | -15.235  | 35.125  |
|              |                                     | Carpet                              | -28.5832 | 23.5875 | 0.950 | -105.455 | 48.289  |
|              | Orange gel mat                      | Orange gel mat                      | -19.7752 | 15.4433 | 0.934 | -69.064  | 29.513  |
|              |                                     | Orange gel mat with black pinnacles | 5.3625   | 7.6144  | 0.998 | -21.811  | 32.536  |
|              |                                     | Orange/brown bulbous mat            | -12.3204 | 19.9011 | 0.999 | -77.328  | 52.688  |
|              |                                     | Spar                                | 13.8363  | 6.0436  | 0.443 | -11.426  | 39.099  |
|              | Floccules                           | Black domes                         | 47.8083  | 12.0009 | 0.006 | 8.852    | 86.765  |

|                                     |                                     |           |         |       |          |         |
|-------------------------------------|-------------------------------------|-----------|---------|-------|----------|---------|
|                                     | Black semi cohesive mat             | 38.0875   | 13.3267 | 0.124 | -5.047   | 81.222  |
|                                     | Network on bulbous mat              | 48.0327*  | 12.0780 | 0.006 | 8.870    | 87.195  |
|                                     | Carpet                              | 9.5043    | 25.7416 | 1.000 | -73.276  | 92.285  |
|                                     | Orange gel mat                      | 18.3123   | 18.5675 | 0.987 | -40.339  | 76.964  |
|                                     | Orange gel mat with black pinnacles | 43.4500*  | 12.8155 | 0.032 | 2.174    | 84.726  |
|                                     | Orange/brown bulbous mat            | 25.7671   | 22.4123 | 0.964 | -46.180  | 97.714  |
|                                     | Spar                                | 51.9238*  | 11.9491 | 0.002 | 13.106   | 90.742  |
|                                     | Black domes                         | -0.2244   | 2.4580  | 1.000 | -8.332   | 7.884   |
|                                     | Black semi cohesive mat             | -9.9452   | 6.2945  | 0.794 | -35.125  | 15.235  |
|                                     | Floccules                           | -48.0327* | 12.0780 | 0.006 | -87.195  | -8.870  |
|                                     | Carpet                              | -38.5284  | 22.9052 | 0.753 | -113.529 | 36.472  |
|                                     | Orange gel mat                      | -29.7204  | 14.3796 | 0.503 | -75.619  | 16.178  |
|                                     | Orange gel mat with black pinnacles | -4.5827   | 5.1240  | 0.991 | -22.282  | 13.117  |
|                                     | Orange/brown bulbous mat            | -22.2656  | 19.0875 | 0.959 | -85.016  | 40.484  |
|                                     | Spar                                | 3.8911    | 2.1913  | 0.697 | -3.334   | 11.117  |
|                                     | Black domes                         | 38.3041   | 22.8647 | 0.757 | -36.592  | 113.200 |
|                                     | Black semi cohesive mat             | 28.5832   | 23.5875 | 0.950 | -48.289  | 105.455 |
|                                     | Floccules                           | -9.5043   | 25.7416 | 1.000 | -92.285  | 73.276  |
|                                     | Network on bulbous mat              | 38.5284   | 22.9052 | 0.753 | -36.472  | 113.529 |
| Carpet                              | Orange gel mat                      | 8.8081    | 26.8984 | 1.000 | -77.237  | 94.853  |
|                                     | Orange gel mat with black pinnacles | 33.9457   | 23.3025 | 0.869 | -42.100  | 109.992 |
|                                     | Orange/brown bulbous mat            | 16.2628   | 29.6830 | 1.000 | -78.532  | 111.058 |
|                                     | Spar                                | 42.4196   | 22.8375 | 0.645 | -32.407  | 117.246 |
|                                     | Black domes                         | 29.4960   | 14.3149 | 0.507 | -16.219  | 75.211  |
|                                     | Black semi cohesive mat             | 19.7752   | 15.4433 | 0.934 | -29.513  | 69.064  |
|                                     | Floccules                           | -18.3123  | 18.5675 | 0.987 | -76.964  | 40.339  |
|                                     | Network on bulbous mat              | 29.7204   | 14.3796 | 0.503 | -16.178  | 75.619  |
|                                     | Carpet                              | -8.8081   | 26.8984 | 1.000 | -94.853  | 77.237  |
|                                     | Orange gel mat with black pinnacles | 25.1377   | 15.0043 | 0.760 | -22.608  | 72.884  |
| Orange gel mat                      | Orange/brown bulbous mat            | 7.4548    | 23.7320 | 1.000 | -68.263  | 83.172  |
|                                     | Spar                                | 33.6115   | 14.2715 | 0.324 | -11.980  | 79.203  |
|                                     | Black domes                         | 4.3583    | 4.9396  | 0.991 | -12.981  | 21.698  |
|                                     | Black semi cohesive mat             | -5.3625   | 7.6144  | 0.998 | -32.536  | 21.811  |
|                                     | Floccules                           | -43.4500* | 12.8155 | 0.032 | -84.726  | -2.174  |
|                                     | Network on bulbous mat              | 4.5827    | 5.1240  | 0.991 | -13.117  | 22.282  |
|                                     | Carpet                              | -33.9457  | 23.3025 | 0.869 | -109.992 | 42.100  |
|                                     | Orange gel mat                      | -25.1377  | 15.0043 | 0.760 | -72.884  | 22.608  |
|                                     | Orange/brown bulbous mat            | -17.6829  | 19.5625 | 0.992 | -81.677  | 46.311  |
|                                     | Spar                                | 8.4738    | 4.8125  | 0.705 | -8.623   | 25.571  |
| Orange gel mat with black pinnacles | Black domes                         | 22.0412   | 19.0388 | 0.960 | -40.586  | 84.668  |
|                                     | Black semi cohesive mat             | 12.3204   | 19.9011 | 0.999 | -52.688  | 77.328  |
|                                     | Floccules                           | -25.7671  | 22.4123 | 0.964 | -97.714  | 46.180  |
|                                     | Network on bulbous mat              | 22.2656   | 19.0875 | 0.959 | -40.484  | 85.016  |
|                                     | Carpet                              | -16.2628  | 29.6830 | 1.000 | -111.058 | 78.532  |
|                                     | Orange gel mat                      | -7.4548   | 23.7320 | 1.000 | -83.172  | 68.263  |
|                                     | Orange gel mat with black pinnacles | 17.6829   | 19.5625 | 0.992 | -46.311  | 81.677  |
|                                     | Spar                                | 26.1567   | 19.0062 | 0.900 | -36.388  | 88.701  |
|                                     | Black domes                         | -4.1155   | 1.7164  | 0.335 | -10.029  | 1.798   |
|                                     | Black semi cohesive mat             | -13.8363  | 6.0436  | 0.443 | -39.099  | 11.426  |
| Orange/brown bulbous mat            | Floccules                           | -51.9238* | 11.9491 | 0.002 | -90.742  | -13.106 |
|                                     | Network on bulbous mat              | -3.8911   | 2.1913  | 0.697 | -11.117  | 3.334   |
|                                     | Carpet                              | -42.4196  | 22.8375 | 0.645 | -117.246 | 32.407  |
|                                     | Orange gel mat                      | -33.6115  | 14.2715 | 0.324 | -79.203  | 11.980  |
|                                     | Orange gel mat with black pinnacles | -8.4738   | 4.8125  | 0.705 | -25.571  | 8.623   |
|                                     | Orange/brown bulbous mat            | -26.1567  | 19.0062 | 0.900 | -88.701  | 36.388  |
| Spar                                | Black domes                         | -4.1155   | 1.7164  | 0.335 | -10.029  | 1.798   |
|                                     | Black semi cohesive mat             | -13.8363  | 6.0436  | 0.443 | -39.099  | 11.426  |
|                                     | Floccules                           | -51.9238* | 11.9491 | 0.002 | -90.742  | -13.106 |
|                                     | Network on bulbous mat              | -3.8911   | 2.1913  | 0.697 | -11.117  | 3.334   |
|                                     | Carpet                              | -42.4196  | 22.8375 | 0.645 | -117.246 | 32.407  |
|                                     | Orange gel mat                      | -33.6115  | 14.2715 | 0.324 | -79.203  | 11.980  |
|                                     | Orange gel mat with black pinnacles | -8.4738   | 4.8125  | 0.705 | -25.571  | 8.623   |
|                                     | Orange/brown bulbous mat            | -26.1567  | 19.0062 | 0.900 | -88.701  | 36.388  |

\*. The mean difference is significant at the 0.05 level.
