# Supplementary material for: Environmental and Biological Controls on Sedimentary Bottom Types in the Puquios of the Salar de Llamara, Northern Chile
Source: MDPI journal article supplement (doi:10.3390/geosciences12060247), 2022-06-14
Supplement: s1 [file s1]

| Parameter              | Units | Resolution | Accuracy                              | Range            |
|------------------------|-------|------------|---------------------------------------|------------------|
| pH                     | pH    | 0.01 pH    | +/- 0.02 pH                           | 0.00-14.00 pH    |
| ORP                    | mV    | 0.1 mV     | +/- 1.0 mV                            | +/- 2000.0 mV    |
| Dissolved Oxygen       | ppm   | 0.01 ppm   | 0-30 ppm: +/- 1.5%; 30-50 ppm: +/- 3% | 0.00-50.00 ppm   |
| Conductivity           | mS/cm | 0.1 mS/cm  | +/- 1%                                | 0.0-200.0 mS/cm  |
| Total Dissolved Solids | ppm   | 1 ppm      | +/- 1%                                | 0-400,000 ppm    |
| Salinity               | PSU   | 0.01 PSU   | +/- 2%                                | 0.00 – 70.00 PSU |
| Turbidity              | FNU   | 0.1 FNU    | +/- 2%                                | 0.0-1000.0 FNU   |

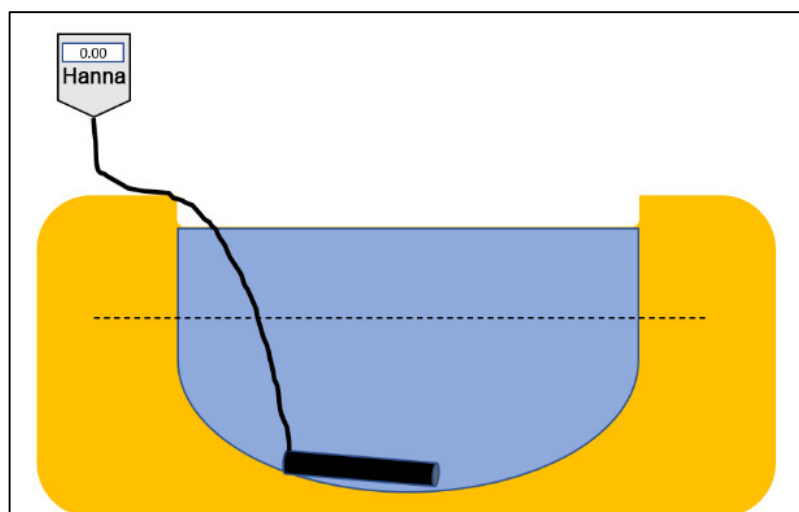

**Supplementary Figure S1.** Hanna 9289 Multiparameter Meter resolution and accuracy and probe position during measurement.
